# 1 **Modified hCFTR mRNA restores normal lung function in a mouse model of cystic** 2 **fibrosis**

3  
4 **Authors:** AKM Ashiqul Haque<sup>1§</sup>, Alexander Dewerth<sup>1§</sup>, Justin S. Antony<sup>1</sup>, Joachim Riethmüller<sup>6†</sup>  
5 Ngadhnjim Latifi<sup>1</sup>, Hanzey Yasar<sup>4</sup>, Petra Weinmann<sup>1</sup>, Nicoletta Pedemonte<sup>3</sup>, Elvira Sondo<sup>3</sup>, Julie  
6 Laval<sup>2</sup>, Patrick Schlegel<sup>1</sup>, Christian Seitz<sup>1</sup>, Brigitta Loretz<sup>4</sup>, Claus-Michael Lehr<sup>4,5</sup>, Rupert  
7 Handgretinger<sup>1</sup>, Michael S. D. Kormann<sup>1\*</sup>

## 8 9 **Affiliations:**

10 · Department of Pediatrics I – Pediatric Infectiology and Immunology, Translational Genomics

11 and Gene Therapy, University of Tuebingen, Germany

12 · Department of Pediatrics I - Immunology and Pneumology/Cystic fibrosis, Department of

13 Pediatrics I, University of Tübingen.

14 · U.O.C. Genetica Medica, Istituto Giannina Gaslini, Genova, Italy

15 · Helmholtz Institute for Pharmaceutical Research Saarland (HIPS), Helmholtz Center for Infection Research (HZI),

16 Saarbruecken, Germany

17 · Department of Pharmacy, Saarland University, Saarbruecken, Germany

18 · Department of Pediatrics I - Cystic Fibrosis Ambulance

19 · The author unfortunately deceased unexpectedly during the preparation of the manuscript

20 · These authors contributed equally to the work; \* Corresponding author

21

22 \*Michael S. D. Kormann, PhD

23 Assistant Professor for Translational Genomics and Gene Therapy in Paediatrics

24 University Children's Hospital-Section I | Paediatric Infectiology & Immunology

25 University of Tübingen - Wilhelmstrasse 27 - 72074 Tübingen - Germany

26 Phone: +49-7071-2973085 - Fax: +49-7071-294717 - Email: [michael.kormann@med.uni-tuebingen.de](mailto:michael.kormann@med.uni-tuebingen.de)

^

27 **Authors' contributions:**

28 A.H., A.D., J.S.A., and M.S.D.K. designed the experiments. A.H., A.D., J.S.A., P.W.,

29 N.L., N.P., E.S., and J.L. performed experiments. A.H. and A.D. analyzed the data.

30 P.S., C.S., H.Y., B.L., C.M. L., and R.H. provided material. A.H., A.D., J.R., and

31 M.S.D.K. interpreted the data. A.H., A.D., J.R., and M.S.D.K. wrote the paper.

32

33 **Keywords:** cystic fibrosis, transcript therapy, mRNA, nanoparticles, lungs, cystic  
34 fibrosis.

35

36 **Abstract:** Being a classic monogenic disease, gene therapy has always been a  
37 promising therapeutic approach for Cystic Fibrosis (CF). However, numerous trials  
38 using DNA or viral vectors encoding the correct protein resulted in a general low  
39 efficacy. In the last years, chemically modified messenger RNA (cmRNA) has been  
40 proven to be a highly potent, pulmonary effective drug. We thus explored the  
41 expression of human (h)CFTR encoded by hCFTR cmRNA *in vitro*, analyzed by flow  
42 cytometry and Western Blot and its function with a YFP assay. Very similar effects  
43 could be observed *in vivo* when hCFTR cmRNA was assembled with Chitosan-coated  
44 PLGA to nanoparticles (NPs) and intratracheally (i.t.) or intravenously (i.v) injected, the  
45 latter one as an alternative administration route to circumvent the clogged airways of  
46 CF patients. This significantly improved lung function, which suggests that hCFTR  
47 cmRNA-NPs are a promising therapeutic option for CF patients independent of their  
48 CFTR genotype.

49

50 **Introduction:** Cystic fibrosis (CF), the most common life-limiting autosomal-recessive  
51 disease in Caucasian populations (1/2,500 newborns), affects more than 80,000 people  
52 world-wide (1). It is caused by different mutations within the gene encoding for the CF  
53 transmembrane and conductance regulator (CFTR). Those mutations result in impaired

54 anion secretion and hyper-absorption of sodium ions across epithelia (2, 3). Chronic  
55 lung disease and slow lung degradation is the major factor contributing to both the  
56 mortality and a strongly reduced quality of life (4, 5). With currently available therapies,  
57 the mean survival is between 35 and 45 years (6, 7). Since the CFTR gene was first  
58 cloned in 1989, many efforts have been made to deal with the mutations at a cellular  
59 and genetic level (8). Gene therapy approaches made it quickly to the clinic aiming to  
60 deliver viral CFTR encoding vectors [such as adenoviruses (Ad) or adeno-associated  
61 viruses (AAV)] to CF patients (9, 10). However, none of the clinical studies and current  
62 treatments seem to provide sufficient human (h)CFTR expression to prevent the  
63 ultimately lethal CF symptoms in the respiratory tract of CF patients. Furthermore,  
64 repeated administration of viral vectors or DNA lead to the development of unwanted  
65 immune reactions, mainly due to viral capsids and vector-encoded proteins (11-13).  
66 Newly designed viral vectors circumvent those problems and can be administered  
67 repeatedly, but from a clinical perspective the field is still in need of a therapeutic tool  
68 that combines efficient expression in lungs and other (affected) organs and cells, while  
69 avoiding immunogenicity and genotoxicity completely (14-16). Recently, *in vitro*  
70 transcribed (IVT) chemically modified messenger RNA (cmRNA) came into focus, which  
71 has the potential to combine the mentioned advantages in a single-stranded molecule  
72 (17-19). Chemically modified mRNA has been tested for repeated administration,  
73 without developing immune responses or losing efficacy, presenting hCFTR cmRNA  
74 complexed with biodegradable chitosan-coated PLGA nanoparticles (NPs) as a  
75 promising therapeutic for the treatment of CF patients (1, 18, 20). Versatile delivery  
76 options of mRNA ensures unique possibility to utilize it in early infants as well as in

77 adults, independent of the underlying *CFTR* mutation. To best of our knowledge, we  
78 provide the first *in vivo* studies delivering h*CFTR* cmRNA to the lungs of CFTR deficient  
79 mice by intravenous (i.v.) and intratracheal (i.t.) administration, complexed with NPs.  
80 We hereby demonstrate a proof of concept of cmRNA-NP-mediated, ELISA quantified  
81 h*CFTR* expression in the lungs of *Cftr*<sup>-/-</sup> mice, leading to significantly reduced chloride  
82 secretion and, more importantly, restored normal lung function parameters.

83

## 84 **Materials and Methods**

85 **mRNA production:** h*CFTR* was PCR amplified from pcDNA3.h*CFTR* with the fusion of  
86 *KpnI* and *EcoRI* restriction sites and cloned into a polyA-120 containing pVAX  
87 (pVAX.A120, [www.lifetechnologies.com](http://www.lifetechnologies.com)) by sticky-end ligation using the mentioned  
88 restriction sites. For control experiments, DsRED reporter protein was sub-cloned into  
89 pVAX.A120 vector from its original vector pDsRED ([www.clontech.com](http://www.clontech.com)). For *in vitro*  
90 transcription (IVT), the plasmids were linearized downstream of the poly-A tail with *XhoI*  
91 ([www.neb.com](http://www.neb.com)). IVT reaction was carried out using MEGAscript T7 Transcription kit  
92 ([www.ambion.com](http://www.ambion.com)) with an anti-reverse CAP analog (ARCA) at the 5' end  
93 ([www.trilink.com](http://www.trilink.com)). To produce modified mRNA, the following chemically modified  
94 nucleosides were added to the IVT reaction in the indicated ratios: uridine-tri-  
95 phosphate (UTP) and cytidine-tri-phosphate (CTP) were fully replaced by N1-Pseudo-

96 UTP and 5-Methyl-CTP, abbreviated to cmRNA<sup>hCFTR</sup><sub>m1ψ<sub>1.0</sub>/m5C<sub>1.0</sub></sub> and partly replaced by  
97 the incorporation of 25% 2-Thio-UTP and 25% 5-methyl-CTP, respectively,

98 abbreviated to cmRNA<sup>hCFTR</sup><sub>s2U<sub>0.25</sub>/m5C<sub>0.25</sub></sub> ([www.trilink.com](http://www.trilink.com)). The h*CFTR* and *DsRed* mRNA

99 were purified using the MEGAclean kit ([www.ambion.com](http://www.ambion.com)) and analyzed for size and  
100 concentration using a RNA NanoChip 6000 for Agilent 2100 Bioanalyzer  
101 ([www.agilent.com](http://www.agilent.com)).

102

103 **Mammalian cell culture and transfection:** Human bronchial epithelial (HBE) and  
104 cystic fibrosis epithelial (CFBE) cell lines were maintained in Minimum Essential  
105 Medium (MEM, [www.biochrom.com](http://www.biochrom.com)) supplemented with 10% (v/v) heat-inactivated  
106 Fetal Calf Serum, L-Glutamine (2 mM) and Penicillin –Streptomycin (50 U/ml). Cells  
107 were incubated at 37 °C in a humidified atmosphere containing 5% CO<sub>2</sub> until they  
108 reached 80-90% confluency. Cell lines were washed with cold sterile PBS and  
109 detached by trypsin-EDTA. Trypsinisation was stopped by adding MEM medium with  
110 serum. Cells were collected and spun down at 500 x g for 5 minutes before  
111 resuspension in fresh MEM. One day before transfection 250,000 cells/well/1 ml were  
112 plated in 12-well plates and grown overnight in MEM without antibiotics. At a  
113 confluency of 70-90%, cells were then transfected with 1000 ng mRNA encoding  
114 hCFTR using lipofectamine 2000 ([www.invitrogen.com](http://www.invitrogen.com)) following the manufacturer's  
115 instructions and after changing the media to the reduced serum media, Opti-MEM  
116 ([www.thermofisher.com](http://www.thermofisher.com)). After 5 h, cells were washed with PBS and serum-containing  
117 MEM was added. Cells were kept for 24 h and 72 h before further analyses.

118

119 **Flow cytometry analyses:** All flow cytometry analyses were performed using a  
120 Fortessa X-20 ([www.bdbioscience.com](http://www.bdbioscience.com)). For detection of hCFTR protein in HBE and  
121 CFBE cell lines, cells were transfected as described above and subsequently prepared

122 for intracellular staining using a Fixation/Permeabilization Solution Kit as directed in the  
123 manufacturer's instruction ([www.bdbioscience.com](http://www.bdbioscience.com)). As primary antibody mouse anti-  
124 human hCFTR clone 596 (1:500, kindly provided by the cystic fibrosis foundation  
125 therapeutics Inc.) has been used. As secondary antibody served Alexa Fluor 488 goat  
126 anti-mouse IgG (1:1,000, [www.lifetechnologies.com](http://www.lifetechnologies.com)). At least 20,000 gated cells per  
127 tube were counted. Data were analyzed with FlowJo software, version 10.

128

129 **YFP-based functional assay:** CFTR activity following transient transfection of hCFTR  
130 (c)mRNA in A549 cells was determined using the halide-sensitive yellow fluorescent  
131 protein YFP-H148Q/I152L (21). CFTR deficient A549 cells stably expressing the YFP  
132 were plated in 96-well microplates (50,000 cells/well) in 100  $\mu$ l of antibiotic-free culture  
133 medium and, after 6 h, transfected with either plasmids carrying the coding sequence  
134 for CFTR or different hCFTR (c)mRNA. For each well, 0.25  $\mu$ g of mRNA or plasmid DNA  
135 and 0.25  $\mu$ l of Lipofectamine 2000 were pre-mixed in 10  $\mu$ l of OPTI-MEM  
136 ([www.invitrogen.com](http://www.invitrogen.com)) to generate transfection complexes that were then added to the  
137 cells. After 24 hours, the complexes were removed by replacement with fresh culture  
138 medium. The CFTR functional assay was carried out 24, 48, or 72 h after transfection.  
139 For this purpose, the cells were washed with PBS and incubated for 20-30 min with  
140 60  $\mu$ l PBS containing forskolin (20  $\mu$ M). After incubation, cells were transferred to a  
141 microplate reader (FluoStar Galaxy; [www.bmg.labtech.com](http://www.bmg.labtech.com)) for CFTR activity  
142 determination. The plate reader was equipped with high-quality excitation (HQ500/20X:  
143  $500 \pm 10$  nm) and emission (HQ535/30M:  $535 \pm 15$  nm) filters for yellow fluorescent  
144 protein ([www.chroma.com](http://www.chroma.com)). Each assay consisted of a continuous 14-s fluorescence

145 reading (5 points per second) with 2 s before and 12 s after injection of 165  $\mu$ l of a  
146 modified PBS containing 137 mM NaI instead of NaCl (final NaI concentration in the  
147 well: 100 mM). To determine iodide ( $I^-$ ) influx rate, the final 11 s of the data for each well  
148 were fitted with an exponential function to extrapolate initial slope. After background  
149 subtraction, cell fluorescence recordings were normalized for the initial average value  
150 measured before addition of  $I^-$ . For each well, the signal decay in the final 11 s of the  
151 data caused by YFP fluorescence quenching was fitted with an exponential function to  
152 derive the maximal slope that corresponds to initial influx of  $I^-$  into the cells (21).  
153 Maximal slopes were converted to rates of variation of intracellular  $I^-$  concentration  
154 (in mM/s) using the equation:  $d[I^-]/dt = K_i[d(F/F_0)/dt]$ . Where  $K_i$  is the affinity constant of  
155 YFP for  $I^-$ , and  $F/F_0$  is the ratio of the cell fluorescence at a given time vs. initial  
156 fluorescence (21).

157  
158 **Whole blood assay:** Blood from three different, healthy donors was taken and  
159 collected in EDTA collection tubes ([www.sarstedt.com](http://www.sarstedt.com)). For each treatment group 2 ml  
160 of EDTA-blood was transferred into 12-well plates and treated accordingly. R-848  
161 (Resiquimod, [www.sigmaaldrich.com](http://www.sigmaaldrich.com)) was added at a concentration of 1 mg/ml to the  
162 respective blood positive controls. (Un-)modified hCFTR mRNA and pDNA (15  $\mu$ g each)  
163 were complexed to NPs at a ratio of 1:10. Samples were incubated at 37 °C in a  
164 humidified atmosphere containing 5% CO<sub>2</sub>. At 6h and 24h, 1ml of whole blood was  
165 transferred into micro tubes containing serum gel ([www.sarstedt.com](http://www.sarstedt.com)) and spun down  
166 at 10,000 x g for 5 min to obtain serum. Sera were stored at -20 °C for further cytokine  
167 measurement analyses.



168

169 **Animal experiments:** All animal experiments were approved by the local ethics  
170 committee and carried out according to the guidelines of the German Law for the  
171 Protection of Animals (file number: 35/9185.81-2 / K/16). *Cftr*<sup>-/-</sup> mice (CFTR<sup>tm1Unc</sup>) were  
172 purchased from Jackson Laboratory (www.jax.org) at an age of 6 to 8 weeks and were  
173 maintained under standardized specific pathogen-free conditions on a 12 h light-dark  
174 cycle. Food, water as well as nesting material were provided *ad libitum*. Prior to i.t.  
175 spray applications, mice were anesthetized intraperitoneally (i.p.) with a mixture of  
176 medetomidine (0.5 mg/kg), midazolam (5 mg/kg) and fentanyl (50 µg/kg). *Cftr*<sup>-/-</sup> mice  
177 received 20 µg or 40 µg of hCFTR (c)mRNA or equivalent of 20 µg or 40 µg (calculated  
178 using nmols) hCFTR pDNA encapsulated in chitosan-coated PLGA nanoparticles  
179 [Chitosan (83% deacetylated (Protasan UP CL 113) coated PLGA (poly-D,L-lactide-co-  
180 glycolide 75:25 (Resomer RG 752H) nanoparticles; short: NPs] by intratracheal (i.t.)  
181 spraying (n=4), and intravenous (i.v.) injection (n=4-7) into the tail vein. Mock treated  
182 control *Cftr*<sup>-/-</sup> mice received 20 µg *DsRed* mRNA complexed to NPs (n=5) by i.t.  
183 delivery or just 200 µl of NPs by both i.v. and i.t. delivery. For both interventions,  
184 (c)mRNA-NP and pDNA-NP complexes were administered in a total volume of 200 µl.  
185 Mice received two injections on a three day interval (day 0 and day 3). Detailed  
186 description of the i.t. procedures are explained in previous published study (22). After 6  
187 days mice were sacrificed for further end point analyses. To assess immune responses  
188 to (un-)modified hCFTR mRNA and hCFTR pDNA, C57/BL6 mice (n=4 per group) were

189 treated as described for *Cftr*<sup>-/-</sup> mice. As positive controls served mice that received *E.*  
190 *coli* mRNA-NPs (20 µg) intravenously. C57BL/6 mice received one injection of 20 µg  
191 mRNA complexed to NPs. After 6 h, 24 h and 72 h mice were sacrificed and blood was  
192 collected to obtain serum.

193 **Pulmonary mechanics:** Lung function for each group was evaluated using a  
194 FlexiVent<sup>®</sup> ([www.scireq.com](http://www.scireq.com)). Prior to tracheostomy, mice were anaesthetized  
195 intraperitoneally as described above. After anaesthesia, a 0.5 cm incision was  
196 performed from the rostral to caudal direction. The flap of skin was retracted, the  
197 connective tissue was dissected, and the trachea was exposed. The trachea was then  
198 cannulated between the second and third cartilage rings with a blunt-end stub adapter.  
199 The mouse was connected to the FlexiVent<sup>®</sup> system and respiratory mechanics were  
200 measured.

201  
202 **Salivary assay:** Prior to tracheostomy, anaesthetized mice were injected with 50 µl of 1  
203 mM acetylcholine (ACh) in the cheek to stimulate production of saliva. The fluid was  
204 collected via glass capillaries and a chloride assay was performed using the Chloride  
205 (Cl<sup>-</sup>) Assay Kit according to the manufacturer's protocol ([www.sigmaaldrich.com](http://www.sigmaaldrich.com)).  
206 Briefly, saliva was diluted at a ratio of 1:100 with water in a total volume of 50 µl and  
207 subsequently 150 µl chloride reagent was added. After 15 min incubation at room  
208 temperature in the dark, absorbance was measured at 620 nm using an EnSight  
209 Multimode plate reader ([www.perkinelmer.com](http://www.perkinelmer.com)).

210

211 **Western blot analysis:** Protein lysate isolated from cell lines was separated on Bolt  
212 NuPAGE 4-12% Bis-Tris Plus gels and a Bolt Mini Gel Tank (all from  
213 [www.lifetechnologies.com](http://www.lifetechnologies.com)). Immunoblotting for hCFTR was performed by standard  
214 procedures according to the manufacturer's instructions using the XCell II Mini-Cell  
215 and blot modules ([www.lifetechnologies.com](http://www.lifetechnologies.com)). After blocking with Blocking buffer (5%  
216 Nonfat Dry milk, [www.cellSignaling.com](http://www.cellSignaling.com)) for 1 h at room temperature, primary  
217 antibodies against hCFTR (clone 596, 1:1,000) or mouse anti-GAPDH (1:5,000,  
218 [www.scbt.com](http://www.scbt.com)) were incubated overnight; horseradish peroxidase-conjugated  
219 secondary antibodies (1:5000, anti-mouse from [www.dianova.com](http://www.dianova.com)) were incubated for  
220 1 h at room temperature. Blots were processed using ECL Prime Western Blot  
221 Detection Reagents ([www.gelifesciences.com](http://www.gelifesciences.com)). Semiquantitative analysis was  
222 performed using the ImageJ software.

223

224 **Real-time RT-PCR:** After i.t. or i.v. injection of differently modified hCFTR cmRNA the  
225 lungs were isolated at day 6 (experimental end point) homogenized and lysed with  
226 tubes of the Precellys Ceramic Kit 1.4/2.8 mm at 5,000 rpm for 20 s in a Precellys  
227 Evolution Homogenizer for subsequent RNA-isolation (all from [www.peqlab.com](http://www.peqlab.com)).  
228 Reverse transcription of 50 ng RNA was carried out using an iScript cDNA synthesis kit  
229 ([www.bio-rad.com](http://www.bio-rad.com)). Detection of hCFTR mRNA was performed by SYBR-Green based  
230 quantitative Real-time PCR in 20 µl reactions on a ViiA7 ([www.lifetechnologies.com](http://www.lifetechnologies.com)). In  
231 all involved procedures we strictly followed the MIQE protocols for RealTime  
232 experiments (23). Pre- and post-reaction rooms were strictly separated. Reactions  
233 were incubated for 10 min at 95 °C, followed by 40 cycles of 15 s at 95°C and 2 min at

234 50°C (annealing and extension), followed by standard melting curve analysis. The  
235 following primer pairs were used: hCFTR fwd TGTACGGCTACAGGGGAA, hCFTR  
236 rev GCCGATAGGCAGATTGTA; house-keeping gene 18S rRNA  
237 fwd GGGAGCCTGAGAAACGGC, 18S rRNA rev GACTTGCCCTCCAATGGATCC.

238

239 **Enzyme-linked immunosorbent assays (ELISAs):** To detect protein levels of hCFTR  
240 after i.t. or i.v. injection of differently modified hCFTR cmRNA, the lungs were isolated  
241 at day 6 (experimental end point). A human CFTR ELISA kit was used  
242 ([www.elabscience.com](http://www.elabscience.com)). Protein was isolated in 600 µl RIPA-buffer and 5 µl protease  
243 inhibitor cocktail using the Precellys Ceramic Kit with a bead size of 1,4/2,8 mm  
244 ([www.sigmaaldrich.com](http://www.sigmaaldrich.com)). Tissue was homogenized in a Precellys Evolution  
245 Homogenizer at 6,500 rpm for 10 s for a total of three cycles, each interrupted by a  
246 15 s break ([www.peqlab.com](http://www.peqlab.com)). Subsequently, supernatants were kept on ice and  
247 additionally homogenized 10 times with a 20G needle and incubated for 20 min  
248 ([www.bdbioscience.com](http://www.bdbioscience.com)). Lysates were spun down for 20 min at 13,000 x g and 4°C.  
249 Supernatant was collected and stored at -20°C for further use. Prior to hCFTR ELISA  
250 detection, protein concentration was measured using the Pierce BCA protein assay kit  
251 ([www.thermofisher.com](http://www.thermofisher.com)). For each sample an equal amount of 15 µg whole protein  
252 lysate was used. For cytokine measurement, blood from mice and donors was taken to  
253 obtain serum and tested for IFN-α and TNF-α production as directed in the  
254 manufacturer's instructions ([www.bdbioscience.com](http://www.bdbioscience.com)).

255

256 **Statistics:** All analyses were performed using the Wilcoxon-Mann-Whitney test with  
257 Graphpad Prism Version 6 ([www.graphpad.com](http://www.graphpad.com)). Most of the data are represented as  
258 mean  $\pm$  SD; box plot data are represented as mean  $\pm$  minimum to maximum values  $P$   
259  $\leq 0.05$  (two-sided) was considered statistically significant.

260

## 261 **Results**

### 262 **hCFTR (c)mRNA and hCFTR protein quantification *in vitro***

263 To evaluate the influence of chemical nucleoside modification on hCFTR mRNA, we  
264 first conducted a set of *in vitro* analyses to characterize the efficacy and functionality of  
265 hCFTR protein expression. First, we compared the expression profile of plasmid-  
266 encoded hCFTR, unmodified hCFTR mRNA and two well-defined nucleoside  
267 modifications which have been described to exert state-of-the-art stability/expression  
268 *in vitro* or in lung-specific cell contexts *in vivo* (1, 24-26). Flow cytometry analyses 24 h  
269 after transfection of human cystic fibrosis bronchial epithelial (CFBE) cells showed  
270 hCFTR positive cells ranging from 15.8% after hCFTR pDNA transfection to 23.7%  
271 after unmodified hCFTR mRNA transfection and up to 33.6% and 49.6% after

272  $\text{cmRNA}_{\text{s}2\text{U}_{0.25}/\text{m}5\text{C}_{0.25}}^{\text{hCFTR}}$  and  $\text{cmRNA}_{\text{m}1\psi_{1.0}/\text{m}5\text{C}_{1.0}}^{\text{hCFTR}}$  transfection, respectively. At 24 h all

273 transfection rates (hCFTR-positive cells, marked as black dots) and hCFTR median  
274 fluorescence intensities (MFIs, marked as columns) of unmodified hCFTR mRNA,

275 cmRNA<sup>hCFTR</sup><sub>s2U<sub>0.25</sub>/m5C<sub>0.25</sub></sub>, and cmRNA<sup>hCFTR</sup><sub>m1Ψ<sub>1.0</sub>/m5C<sub>1.0</sub></sub>, were significantly higher compared  
276 to pDNA ( $P \leq 0.05$ ; Figure 1A, left lower panel).

277 Total hCFTR expression, defined as median fluorescent intensity (MFI) multiplied by the  
278 transfection efficiency, was significantly higher of cmRNA<sup>hCFTR</sup><sub>m1Ψ<sub>1.0</sub>/m5C<sub>1.0</sub></sub>, unmodified

279 hCFTR mRNA and cmRNA<sup>hCFTR</sup><sub>s2U<sub>0.25</sub>/m5C<sub>0.25</sub></sub> at 24 h compared to pDNA ( $P \leq 0.05$ ; Figure  
280 1A, left upper panel). In contrast, after 72 h all three hCFTR (c)mRNAs expressed

281 significantly lower compared to hCFTR pDNA transfected cells, reflected both in  
282 percentage of positive cells, MFI and in total hCFTR expression ( $P \leq 0.05$ ; Figure 1A,

283 both right panels). Expression of cmRNA<sup>hCFTR</sup><sub>s2U<sub>0.25</sub>/m5C<sub>0.25</sub></sub> and cmRNA<sup>hCFTR</sup><sub>m1Ψ<sub>1.0</sub>/m5C<sub>1.0</sub></sub>  
284 compared to unmodified hCFTR mRNA after 72 h was also significantly lower ( $P \leq$   
285 0.05).

286 To confirm and substantiate those findings, we performed Western blot analyses of  
287 protein lysates taken from transfected CFBE cells at 24 h and 72 h post treatment  
288 (Figure 1B). As a positive control served protein lysate from untransfected HBE cells,

289 and GAPDH was used to normalize band intensities. At 24 h hCFTR pDNA transfected  
290 CFBE cells showed an average of 22.8% of the protein expression of hCFTR observed

291 in HBE cells, which increased 4.1-fold to 94.0% at 72 h (Figure 1B). This drastic  
292 increase of hCFTR expression after pDNA transfection goes well in line with the

293 observations in flow cytometry as does the quick onset of hCFTR expression after  
294 hCFTR (c)mRNA transfection at 24 h (Figure 1B). However, relative to the 24 h time-

295 point, hCFTR expression either remained nearly static (unmodified hCFTR mRNA

296 resulted in 33.8% and 34.7% expression at 24 h and 72 h, respectively), decreased  
297 (cmRNA<sup>hCFTR</sup><sub>s2U<sub>0.25</sub>/m5C<sub>0.25</sub></sub> resulted in 45% and dropped to 29.3% hCFTR expression at  
298 24 h and 72 h, respectively) or increased (cmRNA<sup>hCFTR</sup><sub>m1Ψ<sub>1.0</sub>/m5C<sub>1.0</sub></sub>, 46.4% at 24 h and  
299 raised to 63.3% at 72 h). Ultimately, the expression of hCFTR mRNA *in vitro* was  
300 strongly dependent on its chemical modification, with cmRNA<sup>hCFTR</sup><sub>m1Ψ<sub>1.0</sub>/m5C<sub>1.0</sub></sub> resulting  
301 in the most robust hCFTR expression.

302

### 303 **hCFTR (c)mRNA functionality test *in vitro***

304 For functional analysis of the (c)mRNA-encoded CFTR channel, we performed a YFP-  
305 based functional assay using CFTR null A549 cells which stably express halide-  
306 sensitive YFP-H148Q/I152L (25). Quenching of the YFP signal induced by hCFTR  
307 channel-mediated I<sup>-</sup> influx is reciprocally proportional to hCFTR channel function (21,  
308 27). Figure 1C shows the quenching efficacy after transfection of 250 ng hCFTR  
309 (c)mRNA, for three different time points, normalized to mock transfected cells. In pDNA  
310 transfected cells, the quenching efficacy was significantly higher after 48 h and stayed  
311 high even after 72 h ( $P \leq 0.05$ ), while unmodified as well as modified hCFTR mRNA  
312 transfected cells revealed a single peak quenching at 48 h ( $P \leq 0.05$ ), which was  
313 undetectable at 72 h, which is in line with expression patterns seen in Figure 1A and  
314 Figure 1B.

315

316 **hCFTR (c)mRNA and hCFTR protein quantification in lungs after application *in***  
317 ***vivo***

318 We tested for the localization of hCFTR (c)mRNA complexed with nanoparticle in the  
319 lungs after i.t. or i.v. application via RT-qPCR, quantified the hCFTR protein expression  
320 with hCFTR ELISA and then evaluated its immunogenicity depending on modification.

321 Accordingly an experimental setup has been established (Figure 2A) with  
322 comprehensive treatment schemes and unambiguous main outcome parameters (Figure

323 2B). In contrast to the *in vitro* data, when 40 µg cmRNA<sup>hCFTR</sup><sub>s2U<sub>0.25</sub>/m5C<sub>0.25</sub></sub> was i.v. injected  
324 into the mice, this resulted in a ~3.8-fold higher accumulation of that mRNA in the lung

325 as compared to 40 µg cmRNA<sup>hCFTR</sup><sub>m1ψ<sub>1.0</sub>/m5C<sub>1.0</sub></sub> and hCFTR pDNA ( $P \leq 0.05$ , Figure 2C).

326 More importantly, we wanted to analyze if there is a significant increase in hCFTR  
327 protein levels in the lungs of treated mice by hCFTR ELISA (Figure 2D). These analyses

328 confirmed that mice treated with 40 µg cmRNA<sup>hCFTR</sup><sub>s2U<sub>0.25</sub>/m5C<sub>0.25</sub></sub> i.v. had a highly  
329 significant increase of hCFTR in the lungs of treated mice vs control mice ( $P \leq 0.01$ ;

330 Figure 2D). Moreover, we tested the effects of an increased amount of

331 cmRNA<sup>hCFTR</sup><sub>s2U<sub>0.25</sub>/m5C<sub>0.25</sub></sub> and hCFTR pDNA i.t. to 80 µg, which initially seemed to have a

332 low deposition (Figure 2D), but again showed a clear and significant increase of hCFTR

333 protein compared to control mice (Figure 2D) ( $P \leq 0.05$ ). All the mock controls used in

334 hCFTR Elisa has proved to be not significantly different from negative control.

335



336 **hCFTR (c)mRNA immunogenicity *in vivo* in mice after i.v. application and *ex vivo***  
337 **in an adapted human whole blood assay\***

338 \*all *in vivo* experiments were performed with nanoparticles if not stated otherwise

339 Due to lack of a reliable method to detect immune responses that therapeutic mRNAs  
340 may trigger in a living organisms, we focussed on two different approaches. First, we  
341 applied different compounds such as nanoparticles and R-848 (Resiquimod, a strong  
342 TLR7 and TLR8 agonist) and modified or unmodified mRNA i.v. or i.t. to mice to  
343 monitor their immune reaction at three different time points. All compounds, mRNAs  
344 and application routes are color-coded in Figure 2A. Surprisingly, applying 40 µg  
345 unmodified hCFTR mRNA or hCFTR cmRNA (with any modifications used) did not lead  
346 to detectable responses of key cytokines IFN-α or TNF-α (detected by ELISA) at all  
347 three time points (Figure 2E) (28, 29). Nanoparticles alone (used in all *in vivo*  
348 experiments) showed no immune response over the detection limit. However, as  
349 expected the positive control (*E. coli* extract total RNA) resulted in a significant  
350 increase of IFN-α and TNF-α at 6 h and a trend increase of IFN-α at 24 h, while an  
351 effect at 72 h was not detectable (Figure 2E).

352 In contrast to that, different results were obtained when we used a more complex  
353 assay based on human whole blood. Interestingly, the negative control groups (blood  
354 only and NP only) did not raise IFN-α values above the detection limit (Figure 2F, red  
355 dotted lines), while one sample of TNF-α was already measureable in human blood  
356 untreated or treated only with NPs. That is the reason why we adapted the graphical  
357 presentation of Figure 2F as we already did in Fig. 2D, using a blue colored area that  
358 represents the variance of the negative controls, which are biological replicates. The

359 positive control (R-848) lead to a strong and significant production of both IFN- $\alpha$  (6 h  
360 and 24 h, respectively;  $P \leq 0.05$ ) and TNF- $\alpha$  (6 h and 24 h, respectively;  $P \leq 0.05$ )  
361 (Figure 2F).

362 Human whole blood transfected with hCFTR cmRNAs showed a very similar result in  
363 cytokine expression as observed for negative controls: the IFN- $\alpha$  levels did not reach  
364 the detection limit of the ELISA; TNF- $\alpha$  responses were not statistically significant at 6  
365 h and 24 h, respectively (Figure 2F). Unmodified hCFTR mRNA resulted in a significant  
366 increase of IFN- $\alpha$  ( $30.6 \pm 3.0$  pg/ml and  $16.6 \pm 3.5$  pg/ml at 6 h and 24 h, respectively;  
367  $P \leq 0.05$ ) while the TNF- $\alpha$  levels were in line with the negative control. While hCFTR  
368 pDNA triggered high TNF- $\alpha$  responses at 6 h and 24 h ( $785.5 \pm 256.80$  pg/ml and  
369  $336.29 \pm 182.68$  pg/ml respectively;  $P \leq 0.05$ ), lower but detectable IFN- $\alpha$  responses  
370 after 6 h and 24 h ( $17.24 \pm 4.43$  pg/ml and  $21.82 \pm 1.21$  pg/ml) could be observed. Due  
371 to both a significantly lower expression of unmodified hCFTR mRNA *in vitro* (Figure 1A  
372 and 1B) and higher immune responses of unmodified hCFTR mRNA depicted in Figure  
373 2F, we focused on hCFTR cmRNAs and hCFTR pDNA in the following therapeutic  
374 studies.

375

### 376 **Therapeutic effect of hCFTR (c)mRNA *in vivo* in mice after i.t. and i.v. application\***

377 \*all *in vivo* experiments were performed with nanoparticles if not stated otherwise

378 After the expression- and immuno-profiling, we investigated the therapeutic potential  
379 of cmRNA in a mouse model of Cystic Fibrosis. In order to test the efficacy of hCFTR  
380 cmRNA, CFTR knock-out mice have been used in several experimental settings that

381 are explained and color-coded in Figure 3A. First, we performed a well established  
382 functional test, measuring the mouse saliva chloride concentration (30). The saliva  
383 chloride concentration detected in *Cftr*<sup>-/-</sup> mice (4084 ± 236.8 ng/μl) was significantly  
384 higher compared to *Cftr*<sup>+/+</sup> mice (748.8 ± 96.9 ng/μl,  $P \leq 0.01$ ; Figure 3B). The  
385 treatment with either cmRNA<sub>s2U<sub>0.25</sub>/m5C<sub>0.25</sub></sub><sup>hCFTR</sup> i.v. or i.t. (80μg) significantly lowered the  
386 chloride concentrations in the saliva of *Cftr*<sup>-/-</sup> mice more than 52% and 36% respectively  
387 ( $P \leq 0.05$ ; Figure 3B). However cmRNA<sub>m1Ψ<sub>1.0</sub>/m5C<sub>1.0</sub></sub><sup>hCFTR</sup> and *hCFTR* pDNA treated mice  
388 (i.v.) only provided a 22% reduction, although increased amount *hCFTR* pDNA  
389 treatment (i.t.) resulted in 30% reduction of chloride concentration in saliva of *Cftr*<sup>-/-</sup>  
390 mice ( $P \leq 0.05$ ; Figure 4B).

391 To assess the impact of *hCFTR* cmRNA on lung function, we evaluated clinically  
392 relevant parameters using the FlexiVent® lung function measurement system. We  
393 observed significant differences between Mock controls / *Cftr*<sup>-/-</sup> and healthy wild-type  
394 mice for all parameters measured ( $P \leq 0.05$  ; Figure 3C-E and  $P \leq 0.01$ ; Figure 3F).

395 Applying 40 μg of cmRNA<sub>s2U<sub>0.25</sub>/m5C<sub>0.25</sub></sub><sup>hCFTR</sup> i.v. significantly lowered the resistance ( $P \leq$   
396 0.01; Figure 3D). Furthermore, i.v. administration of cmRNA<sub>s2U<sub>0.25</sub>/m5C<sub>0.25</sub></sub><sup>hCFTR</sup> significantly  
397 increased the compliance from 0.02 ± 0.01 ml/cmH<sub>2</sub>O (*Cftr*<sup>-/-</sup> mice) to 0.03 ± 0.01  
398 ml/cmH<sub>2</sub>O ( $P \leq 0.01$ ), reaching equivalent values to those measured in *Cftr*<sup>+/+</sup> mice

399 (Figure 3C) . In the i.t. treated groups, a significant improvement of resistance and  
400 compliance could be detected when the cmRNA<sup>hCFTR</sup><sub>s2U<sub>0.25</sub>/m5C<sub>0.25</sub></sub> dose was increased to  
401 80 µg (0.86 ± 0.18 cmH<sub>2</sub>O.s/ml and 0.04 ± 0.01 ml/cmH<sub>2</sub>O, respectively; P ≤ 0.05;  
402 Figures 3C-D). However 40 µg of cmRNA<sup>hCFTR</sup><sub>m1Ψ<sub>1.0</sub>/m5C<sub>1.0</sub></sub> i.v. lowered the resistance but  
403 not as effectively as cmRNA<sup>hCFTR</sup><sub>s2U<sub>0.25</sub>/m5C<sub>0.25</sub></sub> (P ≤ 0.05; Figure 4D) and *hCFTR* pDNA  
404 (80µg) i.t. treated mice also produced significant improvement of resistance and  
405 compliance (P ≤ 0.05, Figure 4C-D). Furthermore the i.v. application of 40 µg  
406 cmRNA<sup>hCFTR</sup><sub>m1Ψ<sub>1.0</sub>/m5C<sub>1.0</sub></sub> or *hCFTR* pDNA did not alter compliance significantly (Figure  
407 4C).  
408 Tissue elastance (peripheral lung mechanics), that is, energy conservation in the alveoli,  
409 was significantly improved for cmRNA<sup>hCFTR</sup><sub>s2U<sub>0.25</sub>/m5C<sub>0.25</sub></sub> i.v. treated group (P ≤ 0.01;Figure  
410 3F) and i.t. application of 80 µg cmRNA<sup>hCFTR</sup><sub>s2U<sub>0.25</sub>/m5C<sub>0.25</sub></sub> (P ≤ 0.05; Figure 3E) compared  
411 to *Cftr*<sup>-/-</sup> mice, in which tissue elastance was detected with a value of 53.61 ± 10.67  
412 cmH<sub>2</sub>O/ml. cmRNA<sup>hCFTR</sup><sub>m1Ψ<sub>1.0</sub>/m5C<sub>1.0</sub></sub> and *hCFTR* pDNA, (i.v. and i.t.) treatment produced  
413 a improved tissue elastance but failed to reach the effect of i.v treatment of  
414 cmRNA<sup>hCFTR</sup><sub>s2U<sub>0.25</sub>/m5C<sub>0.25</sub></sub> (P ≤ 0.05; Figure 4E and Figure 3E).

415 FEV<sub>0.1</sub> (human equivalent of FEV<sub>1</sub>) of *Cftr*<sup>+/+</sup> mice defined as projecting 100% forced  
416 exhale volume, the i.v. injection of 40 µg cmRNA<sup>hCFTR</sup><sub>s2U<sub>0.25</sub>/m5C<sub>0.25</sub></sub> or i.t. application of 80  
417 µg cmRNA<sup>hCFTR</sup><sub>s2U<sub>0.25</sub>/m5C<sub>0.25</sub></sub> improved the FEV<sub>0.1</sub> by 23% ( $P \leq 0.01$ ) and 19% ( $P \leq 0.05$ )  
418 respectively compare to untreated *Cftr*<sup>-/-</sup> (Figure 3F). Only i.v. injection of 40 µg  
419 cmRNA<sup>hCFTR</sup><sub>m1ψ<sub>1.0</sub>/m5C<sub>1.0</sub></sub> provide a FEV<sub>0.1</sub> improvement of 14% which is statistically  
420 significant ( $P \leq 0.05$ ; Figure 4F). However i.v. or i.t. administration of *hCFTR* pDNA  
421 showed no significant improvement of FEV<sub>0.1</sub>. Taken together, these results  
422 demonstrate significant lung function improvement in all relevant lung function  
423 parameters of *Cftr*<sup>-/-</sup> mice treated with *hCFTR* cmRNA.

424

## 425 Discussion

426 Although much progress has been achieved since the discovery of the *CFTR* gene 25  
427 years ago, there is still a substantial need to restore robust CFTR function in patients  
428 suffering from cystic fibrosis (31). With the recent approvals of the small molecule  
429 agents ivacaftor and lumacaftor, science has paved a possible way to overcome the  
430 hurdles caused by the disease-conferring gene. Those treatments can be more or less  
431 effectively applied to patients bearing *CFTR* mutations delF508 (Lumacaftor-  
432 ivacaftor/Orkambi) and G551D (ivacaftor) (32-35). However, lung function as one of the  
433 main outcome parameters probably having the most significant influence on life quality  
434 of CF patients, is rarely tested in preclinical models. In fact, actual effects of (modern)

435 existing drugs on lung function, with forced expiratory volume in one second (FEV<sub>1</sub>) as  
436 a key parameter, are quite low (36). Here by using hCFTR (c)mRNA, we are presenting  
437 a proof of concept for a viable and potent therapeutic alternative. We have vigorously  
438 tested mRNA therapy with focus on *in vivo* lung function normalization while avoiding  
439 any possible, unwanted immune responses for a possibility of repeated dosing. The  
440 unique formulation utilized, can be used both topically (intratracheally) and systemically  
441 (via i.v. injection), having in both cases a profound effect on normalizing the lung  
442 function parameters, including compliance, resistance and FEV<sub>0.1</sub> of treated *Cftr*<sup>-/-</sup> mice  
443 to values obtained from *Cftr*<sup>+/+</sup> mice.

444 *In vitro*, using hCFTR cmRNA, CFTR protein expression in CFBE cells was increased  
445 up to 5.5-fold compared to unmodified hCFTR mRNA, which is consistent with  
446 previous studies obtained by us and others (2, 26, 37). Incorporation of naturally  
447 occurring nucleosides has been shown to suppress inhibitory effects on translation by  
448 avoiding detection by pattern recognition receptors (PRRs) such as Toll-like receptors  
449 (TLRs) TLR3, TLR7 and TLR8 (28, 29). Those receptors play a crucial role in the  
450 detection, processing and degradation of mRNA. Interestingly, depending on the  
451 mRNA modification, kinetics of hCFTR expression varies upon the different  
452 nucleosides used. In fact, we did not observe an increased quenching efficacy after  
453 72h in CFTR null A549 cells, which would corroborate our findings from western blot  
454 analyses. Although there is a significant increase in I<sup>-</sup> influx by functional hCFTR  
455 channels at 48h post transfection, both modified hCFTR mRNAs showed similar  
456 activity. Consequently, we assume that upon different cell lines, kinetics by which the

457 hCFTR protein is expressed varies. Earlier studies support our notion that different  
458 modified mRNAs can have an impact on the translational effect between distinct cell  
459 lines (26, 29).

460 To better determine the clinical potential of CFTR-encoded cmRNA we compared not  
461 only different modifications *in vivo* but also two different routes of administration.  
462 Applying cmRNA i.t., has been shown to significantly prolong survival in a surfactant  
463 protein-B mouse model (22). Given the fact that in patients suffering from CF one of the  
464 key barriers is the airway mucus layer in which inhaled particles are more likely to get  
465 trapped and removed, we sought to apply hCFTR cmRNA/pDNA complexed to NPs by  
466 i.v. injection as an alternative administration route. Systemic delivery via lipid modified  
467 polymeric nanoparticles has been already shown to target the lungs efficiently (38). In  
468 this study, by applying hCFTR cmRNA consecutively, both modifications were  
469 successfully delivered to the lungs with the i.v. route being more efficient at doses of  
470 40 µg (2 mg/kg) per treatment. Intriguingly, in contrast to the results obtained *in vitro*,

471 cmRNA<sup>hCFTR</sup><sub>s2U<sub>0.25</sub>/m5C<sub>0.25</sub></sub> showed a significantly higher CFTR protein expression with  
472 higher accumulation of hCFTR cmRNA in lung cells. Assuming differences of cmRNA-  
473 encoded transgene expression between distinct cell lines, it is plausible to consider  
474 such differences between *in vitro* versus *in vivo* applications, which is by far more  
475 complex. In this respect, the higher amount of cmRNA<sup>hCFTR</sup><sub>s2U<sub>0.25</sub>/m5C<sub>0.25</sub></sub> found in  
476 lung cells after i.v. injection, might be due to the fact that its nucleoside composition is  
477 more favorable to evade PRRs, thus being less degraded. However, regardless of  
478 cmRNA kinetics we also observed differences in the delivery route of hCFTR

479 cmRNAs/pDNA-NPs. Our data suggests i.v. injection to be more efficient in delivering  
480 such complexes to the lung than topical administration. Tests of hCFTR cmRNA-NP's  
481 capacity of mucus penetration are in planning phase. The upper airways are lined with  
482 mucus and mucociliary movements clear foreign particles immediately. In addition, the  
483 main barriers in the deeper areas are the alveolar lining, scavenger transporters and  
484 alveolar macrophages (39, 40). We therefore concluded, that the dosing by which  
485 cmRNA-NPs were delivered i.t. was not sufficient to reach the lung cells efficiently.  
486 Indeed, increasing the amount by doubling the dose (to 80 µg) for each treatment  
487 showed a significant increase in hCFTR expression.

488 To exclude immune reactions caused by either NPs or the (c)mRNA itself, we  
489 conducted extensive immune assay tests *in vivo*. Except for the positive control (*E. coli*  
490 total mRNA) we could not detect any immunostimulatory effect *in vivo* that could arise  
491 from NPs or the (un-)modified hCFTR mRNAs. These results confirm our previous  
492 studies in which we showed that NPs as well as modified mRNA could be administered  
493 safely to the lungs without any substantial increase in cytokines, or inflammatory-  
494 related cells such as macrophages or neutrophils (22). Systemic delivery has also been  
495 reported to have no impact on proinflammatory cytokine secretion (24). To better  
496 mimic the *in vivo* human conditions, we performed an *ex vivo* whole blood assay (WBA)  
497 which offers a more complex environment to test for immune responses. This assay  
498 has already been used in a number of preclinical settings and Coch and colleagues  
499 could demonstrate that it has the potential to reflect broad aspects of the *in vivo*  
500 cytokine release caused by oligonucleotides (41). Indeed, we could show that the small



501 molecule resiquimod (serving as a positive control by activating TLR7 and TLR8) lead  
502 to a substantial release of IFN- $\alpha$  and TNF- $\alpha$ . Plasmid-encoded hCFTR as well as  
503 unmodified hCFTR mRNA also showed elevated cytokine levels probably due to the  
504 activation of innate immune receptors (28, 29). In contrast, incorporation of modified  
505 nucleosides into hCFTR mRNA abolished such responses, with no detectable amounts  
506 of IFN- $\alpha$ . This is in concert with previously published data, demonstrating cmRNA's  
507 limiting immune responses, mainly by evading detection from receptor such as TLRs,  
508 RIG-1, MDA-5 or PKR (28, 37). Interestingly, even though TNF- $\alpha$  could be detected, it  
509 rather shows donor-dependency than effects deriving from NPs and/or hCFTR cmRNA  
510 with cytokine levels being all within the variance of negative controls. Although it  
511 mirrors only the blood compartment and does not reflect the more complex *in vivo*  
512 situation, the WBA can give a prediction of how cytokines are released in the human  
513 system in response to systemically applied (c)mRNA prior to clinical testing.

514 Eventually, we determined the impact of hCFTR cmRNA and Plasmid-encoded hCFTR  
515 on relevant physiological outcomes such as the saliva chloride concentration as well as  
516 important lung function parameters to evaluate its therapeutical effect. Sweat chloride  
517 concentration has become an accepted method as a diagnostic readout to assess  
518 treatment effects of CF patients (42) . As an analog, chloride concentration of  $\beta$ -  
519 adrenergic stimulated salivary glands of CFTR knock-out mice can be investigated as it  
520 complies with findings in CF patients (30) . In this study, we could show a substantial  
521 difference in salivary Cl<sup>-</sup> content of hCFTR cmRNA and hCFTR pDNA treated mice –  
522 both, i.v and i.t. – compared to their untreated counterpart. With end point-analysis, a

523 significant decrease in  $\text{Cl}^-$  to nearly 60 % was observed, indicating a restoration of  
524 CFTR in the duct compartment of salivary glands and thus leading to an improved  $\text{Cl}^-$   
525 absorption. Previous studies estimated that a restoration of CFTR activity to 50 %  
526 could lead to sweat chloride levels to near normal levels in CF patients. Given that, it is  
527 possible that hCFTR cmRNA treatment has the potential to improve CFTR activity to  
528 levels that are at least similar to those in patients with a mild CF phenotype (43).

529 To support our notion of improved CFTR activity, we additionally performed extensive  
530 lung function measurements using state-of-the-art technology to provide detailed *in*  
531 *vivo* information on different lung function parameters. *Cftr*<sup>-/-</sup> mice have been criticized  
532 as a proper model for cystic fibrosis as it does not reflect the typical lung phenotype  
533 seen in CF patients (44). However, the reason behind that seems to be in how deeply  
534 lungs or other affected organs had been investigated. A layer of material can be  
535 observed with characteristics of an acid mucopolysaccharide on the bronchiolar  
536 surface and is also evident in alveoli by using scanning electron microscopy in *Cftr*<sup>-/-</sup>  
537 mice, which is not evident in *Cftr*<sup>+/+</sup> mice (45). Recent studies could clearly  
538 demonstrate reduced airway compliance and increased resistance in comparison to  
539 wild-type mice (46, 47). Indeed, we observed significantly higher and lower levels  
540 regarding resistance and compliance, respectively, in *Cftr*<sup>-/-</sup> controls and mock-treated  
541 *Cftr*<sup>-/-</sup> mice compared to homozygous wild type mice (*Cftr*<sup>+/+</sup>) mice and demonstrated  
542 that treatment with hCFTR cmRNA-NPs improved compliance and resistance  
543 significantly equal to those seen in healthy *Cftr*<sup>+/+</sup> mice. FEV1 (Forced exhale volume)

544 percentage (for mouse or small animal FEV<sub>0.1</sub>) is related to survival in CF and most  
545 important physiological parameter for CF patients. Previous study demonstrated that  
546 patients with a %FEV1 <30 had a 2-year mortality over 50% and hence it is regularly  
547 examined in clinical setup (48). Our study provide a significant improvement of FEV<sub>0.1</sub>  
548 due to treatment with hCFTR cmRNA-NPs. Interestingly hCFTR pDNA when  
549 administrated via i.t. route improve other parameter of lung function measurements did  
550 amend FEV<sub>0.1</sub> but not as significantly as hCFTR cmRNA-NPs.

551 In addition, intrinsic mechanical properties of the parenchyma are altered in *Cftr*<sup>-/-</sup> mice  
552 with increased tissue elastance (47, 49). Such differences in peripheral lung mechanics  
553 indicate an energy loss due to frictional, resistive forces and that more work will be  
554 required to expand the lungs (elastance) (49). As for the central lung mechanics,  
555 peripheral measurements confirmed i.v.-treated groups to be more effective in  
556 targeting lung cells than topical application, thereby decreasing tissue elastance. We  
557 also observed i.t. administration of 80 µg cmRNA<sup>hCFTR</sup><sub>s2U<sub>0.25</sub>/m5C<sub>0.25</sub></sub> to positively  
558 compensate most of lung fuction parameters. Overall, we could demonstrate that  
559 certain protocols, applying hCFTR cmRNA either i.v. or i.t. efficiently restored lung  
560 function values equal to those of wild type. Suggesting a more evenly distribution  
561 through arteries and the bronchial circulation by i.v.-injection, especially for newborns  
562 and young infants, this route and formulation could lead to a very potent therapy. By  
563 providing functional CFTR early in life, the lungs could be protected from irreversable  
564 damage. Nevertheless, when applied intratracheally - which mimicks deep inhalation of  
565 a spray or powder formulation usually the primary application route in adults - an

566 adjustment in dose and/or formulation (e.g. cmRNA<sup>hCFTR</sup><sub>s2U<sub>0.25</sub>/m5C<sub>0.25</sub></sub> increased to 80 µg)  
567 might easily abrogate any negative effect of the *Cftr*<sup>-/-</sup> genetic background on lung  
568 function.

569 Taken together, this study is the first proof of concept of efficient application of hCFTR  
570 cmRNA NPs *in vivo* to restore lung function in a *Cftr*-deficient mouse model.  
571 Importantly, we could neither detect immune responses *in vivo* nor in a more defined  
572 setting *ex vivo*. Applying hCFTR cmRNA to *Cftr* knock-out mice could efficiently restore  
573 lung function to levels of healthy control mice. In addition, our study compared - apart  
574 from two well-known mRNA modifications and hCFTR pDNA - also two different  
575 delivery routes, demonstrating that systemic administration of cmRNA targets lung  
576 cells more efficiently at lower dosages. This study provides a proof of concept for  
577 alternative treatment of patients suffering from CF. hCFTR cmRNA transcript  
578 supplementation may be broadly applicable for most CFTR mutations, not only in  
579 adults but already in the postnatal state, thereby protecting the lungs from  
580 exacerbations from the very beginning of life.

581

## 582 **Acknowledgements**

583 We thank Dr. Dominik Hartl for experimental guidance on CFTR KO mice; Dr. Sandra  
584 Beer-Hammer and Dr. Franz Igler for helping to draft the respective animal proposal;  
585 Dr. Joachim Riethmüller for the numerous and fruitful discussions on translation of

^

586 h*CFTR* mRNA therapy into the clinic, and Katrin Ganzenberg for mRNA isolation from  
587 various organs of *Cftr* mice and Brain weidensee for editing.

588 **Funding sources:**

589 This work was supported by the European Research Council (ERC Starting Grant to  
590 M.S.D.K., 637752 "BREATHE"), by the Deutsche Forschungsgemeinschaft (DFG KO  
591 4258/2-1, to M.S.D.K. and Lauren Mays), HMZ Private Foundation (to M.S.D.K.),  
592 fortune grant (no. 1980-0-0, to M.S.D.K.) by the European Respiratory Society  
593 (Maurizio Vignola Award, to M.S.D.K.), in part by the Mukoviszidose e.V. (S03/12 to  
594 M.S.D.K.) and by the Italian Cystic Fibrosis Foundation (grant FFC no. 2/2015 to N.P.).

595  
596  
597  
598

## 599 References

- 600 1. Kormann MS, Hasenpusch G, Aneja MK, Nica G, Flemmer AW, Herber-Jonat S, Huppmann M, Mays LE, Illenyi M,  
601 Schams A, Griese M, Bittmann I, Handgretinger R, Hartl D, Rosenecker J, Rudolph C. Expression of therapeutic  
602 proteins after delivery of chemically modified mRNA in mice. *Nat Biotechnol* 2011; 29: 154-157.
- 603 2. Mays LE, Ammon-Treiber S, Mothes B, Alkhaled M, Rottenberger J, Muller-Hermelink ES, Grimm M, Mezger M,  
604 Beer-Hammer S, von Stebut E, Rieber N, Nurnberg B, Schwab M, Handgretinger R, Idzko M, Hartl D, Kormann MS.  
605 Modified Foxp3 mRNA protects against asthma through an IL-10-dependent mechanism. *J Clin Invest* 2013; 123:  
606 1216-1228.
- 607 3. Bell SC, De Boeck K, Amaral MD. New pharmacological approaches for cystic fibrosis: promises, progress,  
608 pitfalls. *Pharmacol Ther* 2015; 145: 19-34.
- 609 4. Boucher RC. Airway surface dehydration in cystic fibrosis: pathogenesis and therapy. *Annu Rev Med* 2007; 58:  
610 157-170.
- 611 5. Matsui H, Grubb BR, Tarran R, Randell SH, Gatzky JT, Davis CW, Boucher RC. Evidence for periciliary liquid layer  
612 depletion, not abnormal ion composition, in the pathogenesis of cystic fibrosis airways disease. *Cell* 1998; 95:  
613 1005-1015.
- 614 6. Cohen MA, Ribeiro MA, Ribeiro AF, Ribeiro JD, Morcillo AM. Quality of life assessment in patients with cystic  
615 fibrosis by means of the Cystic Fibrosis Questionnaire. *J Bras Pneumol* 2011; 37: 184-192.
- 616 7. Havermans T, Colpaert K, Vanharen L, Dupont LJ. Health related quality of life in cystic fibrosis: To work or not  
617 to work? *J Cyst Fibros* 2009; 8: 218-223.
- 618 8. MacKenzie T, Gifford AH, Sabadosa KA, Quinton HB, Knapp EA, Goss CH, Marshall BC. Longevity of patients  
619 with cystic fibrosis in 2000 to 2010 and beyond: survival analysis of the Cystic Fibrosis Foundation patient  
620 registry. *Ann Intern Med* 2014; 161: 233-241.
- 621 9. Cutting GR. Cystic fibrosis genetics: from molecular understanding to clinical application. *Nat Rev Genet* 2015;  
622 16: 45-56.
- 623 10. Riordan JR, Rommens JM, Kerem B, Alon N, Rozmahel R, Grzelczak Z, Zielenski J, Lok S, Plavsic N, Chou JL, et  
624 al. Identification of the cystic fibrosis gene: cloning and characterization of complementary DNA. *Science* 1989;  
625 245: 1066-1073.
- 626 11. Zuckerman JB, Robinson CB, McCoy KS, Shell R, Sferra TJ, Chirmule N, Magosin SA, Propert KJ, Brown-Parr EC,  
627 Hughes JV, Tazelaar J, Baker C, Goldman MJ, Wilson JM. A phase I study of adenovirus-mediated transfer of the  
628 human cystic fibrosis transmembrane conductance regulator gene to a lung segment of individuals with cystic  
629 fibrosis. *Human gene therapy* 1999; 10: 2973-2985.
- 630 12. Bellon G, Michel-Calemard L, Thouvenot D, Jagneaux V, Poitevin F, Malcus C, Accart N, Layani MP, Aymard M,  
631 Bernon H, Bienvenu J, Courtney M, Doring G, Gilly B, Gilly R, Lamy D, Levrey H, Morel Y, Paulin C, Perraud F,  
632 Rodillon L, Sene C, So S, Touraine-Moulin F, Pavirani A, et al. Aerosol administration of a recombinant adenovirus  
633 expressing CFTR to cystic fibrosis patients: a phase I clinical trial. *Human gene therapy* 1997; 8: 15-25.
- 634 13. Thaci B, Ulasov IV, Wainwright DA, Lesniak MS. The Challenge for Gene Therapy: Innate Immune Response to  
635 Adenoviruses. *Oncotarget* 2011; 2: 113-121.
- 636 14. Takaoka A, Wang Z, Choi MK, Yanai H, Negishi H, Ban T, Lu Y, Miyagishi M, Kodama T, Honda K, Ohba Y,  
637 Taniguchi T. DAI (DLM-1/ZBP1) is a cytosolic DNA sensor and an activator of innate immune response. *Nature*  
638 2007; 448: 501-505.
- 639 15. Anson DS. The use of retroviral vectors for gene therapy-what are the risks? A review of retroviral  
640 pathogenesis and its relevance to retroviral vector-mediated gene delivery. *Genetic vaccines and therapy* 2004; 2:  
641 9.
- 642 16. Griesenbach U, Geddes DM, Alton EW. Gene therapy for cystic fibrosis: an example for lung gene therapy.  
643 *Gene Ther* 2004; 11 Suppl 1: S43-50.
- 644 17. Riviere C, Danos O, Douar AM. Long-term expression and repeated administration of AAV type 1, 2 and 5  
645 vectors in skeletal muscle of immunocompetent adult mice. *Gene Ther* 2006; 13: 1300-1308.
- 646 18. Antony JS, Dewerth A, Haque A, Handgretinger R, Kormann MS. Modified mRNA as a new therapeutic option  
647 for pediatric respiratory diseases and hemoglobinopathies. *Mol Cell Pediatr* 2015; 2: 11.
- 648 19. Sahin U, Kariko K, Tureci O. mRNA-based therapeutics - developing a new class of drugs. *Nature reviews Drug*  
649 *discovery* 2014; 13: 759-780.

- 650 20. Zangi L, Lui KO, von Gise A, Ma Q, Ebina W, Ptaszek LM, Später D, Xu H, Tabebordbar M, Gorbatov R, Sena B,  
651 Nahrendorf M, Briscoe DM, Li RA, Wagers AJ, Rossi DJ, Pu WT, Chien KR. Modified mRNA directs the fate of heart  
652 progenitor cells and induces vascular regeneration after myocardial infarction. *Nat Biotechnol* 2013; 31: 898-907.
- 653 21. Galiotta LV, Jayaraman S, Verkman AS. Cell-based assay for high-throughput quantitative screening of CFTR  
654 chloride transport agonists. *American journal of physiology Cell physiology* 2001; 281: C1734-1742.
- 655 22. Mahiny AJ, Dewerth A, Mays LE, Alkhaled M, Mothes B, Malaeksefat E, Loretz B, Rottenberger J, Brosch DM,  
656 Reautschnig P, Surapolchai P, Zeyer F, Schams A, Carevic M, Bakele M, Griese M, Schwab M, Nurnberg B, Beer-  
657 Hammer S, Handgretinger R, Hartl D, Lehr CM, Kormann MS. In vivo genome editing using nuclease-encoding  
658 mRNA corrects SP-B deficiency. *Nat Biotechnol* 2015; 33: 584-586.
- 659 23. Bustin SA, Benes V, Garson JA, Hellems J, Huggett J, Kubista M, Mueller R, Nolan T, Pfaffl MW, Shipley GL,  
660 Vandesompele J, Wittwer CT. The MIQE guidelines: minimum information for publication of quantitative real-  
661 time PCR experiments. *Clin Chem* 2009; 55: 611-622.
- 662 24. Pardi N, Secreto AJ, Shan X, Debonera F, Glover J, Yi Y, Muramatsu H, Ni H, Mui BL, Tam YK, Shaheen F,  
663 Collman RG, Karikó K, Danet-Desnoyers GA, Madden TD, Hope MJ, Weissman D. Administration of nucleoside-  
664 modified mRNA encoding broadly neutralizing antibody protects humanized mice from HIV-1 challenge. *Nature*  
665 *Communications* 2017; 8: 14630.
- 666 25. Pardi N, Tuyishime S, Muramatsu H, Kariko K, Mui BL, Tam YK, Madden TD, Hope MJ, Weissman D. Expression  
667 kinetics of nucleoside-modified mRNA delivered in lipid nanoparticles to mice by various routes. *Journal of*  
668 *controlled release : official journal of the Controlled Release Society* 2015; 217: 345-351.
- 669 26. Andries O, Mc Cafferty S, De Smedt SC, Weiss R, Sanders NN, Kitada T. N(1)-methylpseudouridine-  
670 incorporated mRNA outperforms pseudouridine-incorporated mRNA by providing enhanced protein expression  
671 and reduced immunogenicity in mammalian cell lines and mice. *Journal of controlled release : official journal of*  
672 *the Controlled Release Society* 2015; 217: 337-344.
- 673 27. Goda K, Szaloki G. A sensitive tool to measure CFTR channel activity. *Cytometry Part A : the journal of the*  
674 *International Society for Analytical Cytology* 2013; 83: 528-529.
- 675 28. Kariko K, Buckstein M, Ni H, Weissman D. Suppression of RNA recognition by Toll-like receptors: the impact of  
676 nucleoside modification and the evolutionary origin of RNA. *Immunity* 2005; 23: 165-175.
- 677 29. Kariko K, Muramatsu H, Welsh FA, Ludwig J, Kato H, Akira S, Weissman D. Incorporation of pseudouridine into  
678 mRNA yields superior nonimmunogenic vector with increased translational capacity and biological stability. *Mol*  
679 *Ther* 2008; 16: 1833-1840.
- 680 30. Droebner K, Sandner P. Modification of the salivary secretion assay in F508del mice--the murine equivalent of  
681 the human sweat test. *J Cyst Fibros* 2013; 12: 630-637.
- 682 31. Kerem B, Rommens JM, Buchanan JA, Markiewicz D, Cox TK, Chakravarti A, Buchwald M, Tsui LC. Identification  
683 of the cystic fibrosis gene: genetic analysis. *Science* 1989; 245: 1073-1080.
- 684 32. Cholon DM, Quinney NL, Fulcher ML, Esther CR, Jr., Das J, Dokholyan NV, Randell SH, Boucher RC, Gentsch M.  
685 Potentiator ivacaftor abrogates pharmacological correction of DeltaF508 CFTR in cystic fibrosis. *Science*  
686 *translational medicine* 2014; 6: 246ra296.
- 687 33. Van Goor F, Hadida S, Grootenhuis PD, Burton B, Cao D, Neuberger T, Turnbull A, Singh A, Joubbran J,  
688 Hazlewood A, Zhou J, McCartney J, Arumugam V, Decker C, Yang J, Young C, Olson ER, Wine JJ, Frizzell RA,  
689 Ashlock M, Negulescu P. Rescue of CF airway epithelial cell function in vitro by a CFTR potentiator, VX-770.  
690 *Proceedings of the National Academy of Sciences of the United States of America* 2009; 106: 18825-18830.
- 691 34. Clancy JP, Rowe SM, Accurso FJ, Aitken ML, Amin RS, Ashlock MA, Ballmann M, Boyle MP, Bronsveld I,  
692 Campbell PW, De Boeck K, Donaldson SH, Dorkin HL, Dunitz JM, Durie PR, Jain M, Leonard A, McCoy KS, Moss RB,  
693 Pilewski JM, Rosenbluth DB, Rubenstein RC, Schechter MS, Botfield M, Ordonez CL, Spencer-Green GT, Vernillet L,  
694 Wisse S, Yen K, Konstan MW. Results of a phase IIa study of VX-809, an investigational CFTR corrector  
695 compound, in subjects with cystic fibrosis homozygous for the F508del-CFTR mutation. *Thorax* 2012; 67: 12-18.
- 696 35. Ramsey BW, Davies J, McElvaney NG, Tullis E, Bell SC, Drevinek P, Griese M, McKone EF, Wainwright CE,  
697 Konstan MW, Moss R, Ratjen F, Sermet-Gaudelus I, Rowe SM, Dong Q, Rodriguez S, Yen K, Ordonez C, Elborn JS. A  
698 CFTR potentiator in patients with cystic fibrosis and the G551D mutation. *The New England journal of medicine*  
699 2011; 365: 1663-1672.
- 700 36. Cholon DM, Esther CR, Jr., Gentsch M. Efficacy of lumacaftor-ivacaftor for the treatment of cystic fibrosis  
701 patients homozygous for the F508del-CFTR mutation. *Expert review of precision medicine and drug development*  
702 2016; 1: 235-243.



^

- 703 37. Anderson BR, Muramatsu H, Nallagatla SR, Bevilacqua PC, Sansing LH, Weissman D, Kariko K. Incorporation of  
704 pseudouridine into mRNA enhances translation by diminishing PKR activation. *Nucleic acids research* 2010; 38:  
705 5884-5892.
- 706 38. Kaczmarek JC, Patel AK, Kauffman KJ, Fenton OS, Webber MJ, Heartlein MW, DeRosa F, Anderson DG.  
707 Polymer-Lipid Nanoparticles for Systemic Delivery of mRNA to the Lungs. *Angewandte Chemie (International ed in*  
708 *English)* 2016; 55: 13808-13812.
- 709 39. Paranjpe M, Muller-Goymann CC. Nanoparticle-mediated pulmonary drug delivery: a review. *International*  
710 *journal of molecular sciences* 2014; 15: 5852-5873.
- 711 40. Patton JS, Brain JD, Davies LA, Fiegel J, Gumbleton M, Kim KJ, Sakagami M, Vanbever R, Ehrhardt C. The  
712 particle has landed--characterizing the fate of inhaled pharmaceuticals. *Journal of aerosol medicine and*  
713 *pulmonary drug delivery* 2010; 23 Suppl 2: S71-87.
- 714 41. Coch C, Lück C, Schwickart A, Putschli B, Renn M, Höller T, Barchet W, Hartmann G, Schlee M. A Human In  
715 Vitro Whole Blood Assay to Predict the Systemic Cytokine Response to Therapeutic Oligonucleotides Including  
716 siRNA. *PLOS ONE* 2013; 8: e71057.
- 717 42. Gonzalo-Ruiz J, Mas R, de Haro C, Cabruja E, Camero R, Alonso-Lomillo MA, Munoz FJ. Early determination of  
718 cystic fibrosis by electrochemical chloride quantification in sweat. *Biosensors & bioelectronics* 2009; 24: 1788-  
719 1791.
- 720 43. Rowe SM, Accurso F, Clancy JP. Detection of Cystic Fibrosis Transmembrane Conductance Regulator Activity  
721 in Early-Phase Clinical Trials. *Proceedings of the American Thoracic Society* 2007; 4: 387-398.
- 722 44. Cohen TS, Prince A. Cystic fibrosis: a mucosal immunodeficiency syndrome. *Nature medicine* 2012; 18: 509-  
723 519.
- 724 45. Kent G, Iles R, Bear CE, Huan LJ, Griesenbach U, McKerlie C, Frndova H, Ackerley C, Gosselin D, Radzioch D,  
725 O'Brodovich H, Tsui LC, Buchwald M, Tanswell AK. Lung disease in mice with cystic fibrosis. *J Clin Invest* 1997; 100:  
726 3060-3069.
- 727 46. Geiser M, Zimmermann B, Baumann M, Cruz-Orive LM. Does lack of Cftr gene lead to developmental  
728 abnormalities in the lung? *Experimental lung research* 2000; 26: 551-564.
- 729 47. Craig Cohen J, Lundblad LK, Bates JH, Levitzky M, Larson JE. The "Goldilocks Effect" in Cystic Fibrosis:  
730 identification of a lung phenotype in the cftr knockout and heterozygous mouse. *BMC Genetics* 2004; 5: 21.
- 731 48. Kerem E, Reisman J, Corey M, Canny GJ, Levison H. Prediction of mortality in patients with cystic fibrosis. *The*  
732 *New England journal of medicine* 1992; 326: 1187-1191.
- 733 49. Darrach RJ, Mitchell AL, Campanaro CK, Barbato ES, Litman P, Sattar A, Hodges CA, Drumm ML, Jacono FJ. Early  
734 pulmonary disease manifestations in cystic fibrosis mice. *J Cyst Fibros* 2016; 15: 736-744.  
735  
736  
737  
738



739 **Figure Legends**

740 **Fig. 1: (c)mRNA-mediated expression and function of hCFTR *in vitro*** (A) Percentage of  
741 hCFTR positive CFBE cells and total expression of hCFTR 24 h and 72 h after transfection with  
742 1  $\mu$ g hCFTR pDNA or (chemically modified) hCFTR mRNAs, detected by flow cytometry. \*,  $P \leq$   
743 0.05 versus unmodified hCFTR mRNA; §,  $P \leq 0.05$  vs. pDNA. (B) Western Blots, semi-  
744 quantifying human CFTR in the cell cultures used in (A), normalized to GAPDH and put relative  
745 to CFTR levels in HBE cells. \*,  $P \leq 0.05$  versus CFBE controls at 24 h and §,  $P \leq 0.05$  versus  
746 CFBE controls at 72 h.(C) Quenching efficacy of pDNA or mRNA encoded hCFTR in A549 cells  
747 relative to untransfected CFBE controls was measured at 24 h, 48 h and 72 h post-  
748 transfection. \*,  $P \leq 0.05$  versus untransfected controls; MFI, median fluorescence intensities. All  
749 other bar graph data are depicted as means  $\pm$  SDs while box plots data are depicted as the  
750 means  $\pm$  minimum to maximum values.

751  
752 **Fig. 2: *In vivo* study plan, expression of modified hCFTR mRNA and hCFTR protein in**  
753 **mouse lungs and immunogenicity in mice and human whole blood.**

754 (A) All mouse groups, particles and particle combinations depicted in the study plan (B) and  
755 utilized in (C-F) are color-coded for their treatment schemes, including dosage and application  
756 routes. (C) Relative amounts of differently modified hCFTR mRNAs in the lungs, applied i.v. or  
757 i.t., then determined by RT-quantitative PCR, compared to 40 $\mu$ g cmRNA<sub>s2U<sub>0.25</sub>/m5C<sub>0.25</sub></sub><sup>hCFTR</sup> i.t.  
758 injection (\*,  $P \leq 0.05$ );  $n = 4-7$  mice per group. (D) ELISA, detecting specifically human CFTR,  
759 was performed on lung preparations at day 6 (endpoint); the same  $n = 4-7$  mice per group as in  
760 (C) were used. \*,  $P \leq 0.05$ , \*\*,  $P \leq 0.01$  versus untreated CFTR knock-out mice. (E) Mice were  
761 i.v. or i.t. injected with a mix of (c)mRNA and NPs at a 1:10 ratio, and ELISAs were performed  
762 post-i.v./i.t.-injection at three different time points. n.d., not detectable. (F) 2 ml whole blood,

763 each from three different healthy human donors, were incubated with either R848 (1 mg/ml) or  
764 3.82 pmol pDNA or 7.91 pmol (c)mRNA (providing the same total number of nucleic acid  
765 molecules) and NPs at a 1:10 ratio; after 6 h and 24 h the immune response was determined by  
766 ELISA in the sera; \* and §,  $P \leq 0.05$  versus control at 6 h and 24 h, respectively. The red dotted  
767 lines in **(D-F)** mark the detection limit as specified in the respective ELISA kit. The blue areas in  
768 **(D, F)** represent the variance of the negative controls which are biological replicates. n.d., not  
769 detectable. All bar graph data are depicted as the means  $\pm$  SD and box plots data are  
770 represented as the means  $\pm$  minimum to maximum values.

771  
772 **Fig. 3: *In vivo* lung function measurements in hCFTR mRNA treated CFTR knock-out**  
773 **mice.**

774 All mouse groups utilized in **(B-F)** are color-coded for their treatment schemes **(A)**, including  
775 dosage and application routes. **B)** Functional test of reconstituted CFTR channel compared to  
776 *Cftr* knock-out mice (black), positive controls (violet), and percentages relative to the positive  
777 control;  $n = 4-7$  mice per group; 3 mock controls were included (white); boxes represent the  
778 means  $\pm$  minimum and maximum values. **(C-F)** Precision *in vivo* lung function measurements  
779 covering all relevant outcome parameters on mice treated twice (see **A**) and measured 72  
780 hours after the 2<sup>nd</sup> installment;  $n = 4-7$  mice per group. Data represent the means  $\pm$  SD on  
781 compliance, resistance, tissue elastance and Forced Expiratory Volume in 0.1 seconds (FEV<sub>0.1</sub>).  
782 \*,  $P \leq 0.05$ , \*\*,  $P \leq 0.01$  versus untreated *Cftr* knock-out mice.

783  
784 **Fig. 4: *In vivo* lung function measurements in hCFTR pDNA treated CFTR knock-out mice.**  
785 All mouse groups utilized in **(B-F)** are color-coded for their treatment schemes **(A)**, including  
786 dosage and application routes. **B)** Functional test of reconstituted CFTR channel compared to

787 *Cftr* knock-out mice (black), positive controls (violet), and percentages relative to the positive  
788 control;  $n = 4-7$  mice per group; 3 mock controls were included (white); boxes represent the  
789 means  $\pm$  minimum and maximum values. **(C-F)** Precision *in vivo* lung function measurements  
790 covering all relevant outcome parameters on mice treated twice (see **A**) and measured 72  
791 hours after the 2<sup>nd</sup> installment;  $n = 4-7$  mice per group. Data represent the means  $\pm$  SD on  
792 compliance, resistance, tissue elastance and Forced Expiratory Volume in 0.1 seconds (FEV<sub>0.1</sub>).  
793 \*,  $P \leq 0.05$ , \*\*,  $P \leq 0.01$  versus untreated *Cftr* knock-out mice.

794

795 **Figure 1**

796  
797  
798  
799  
800  
801  
802  
803  
804  
805  
806  
807  
808  
809

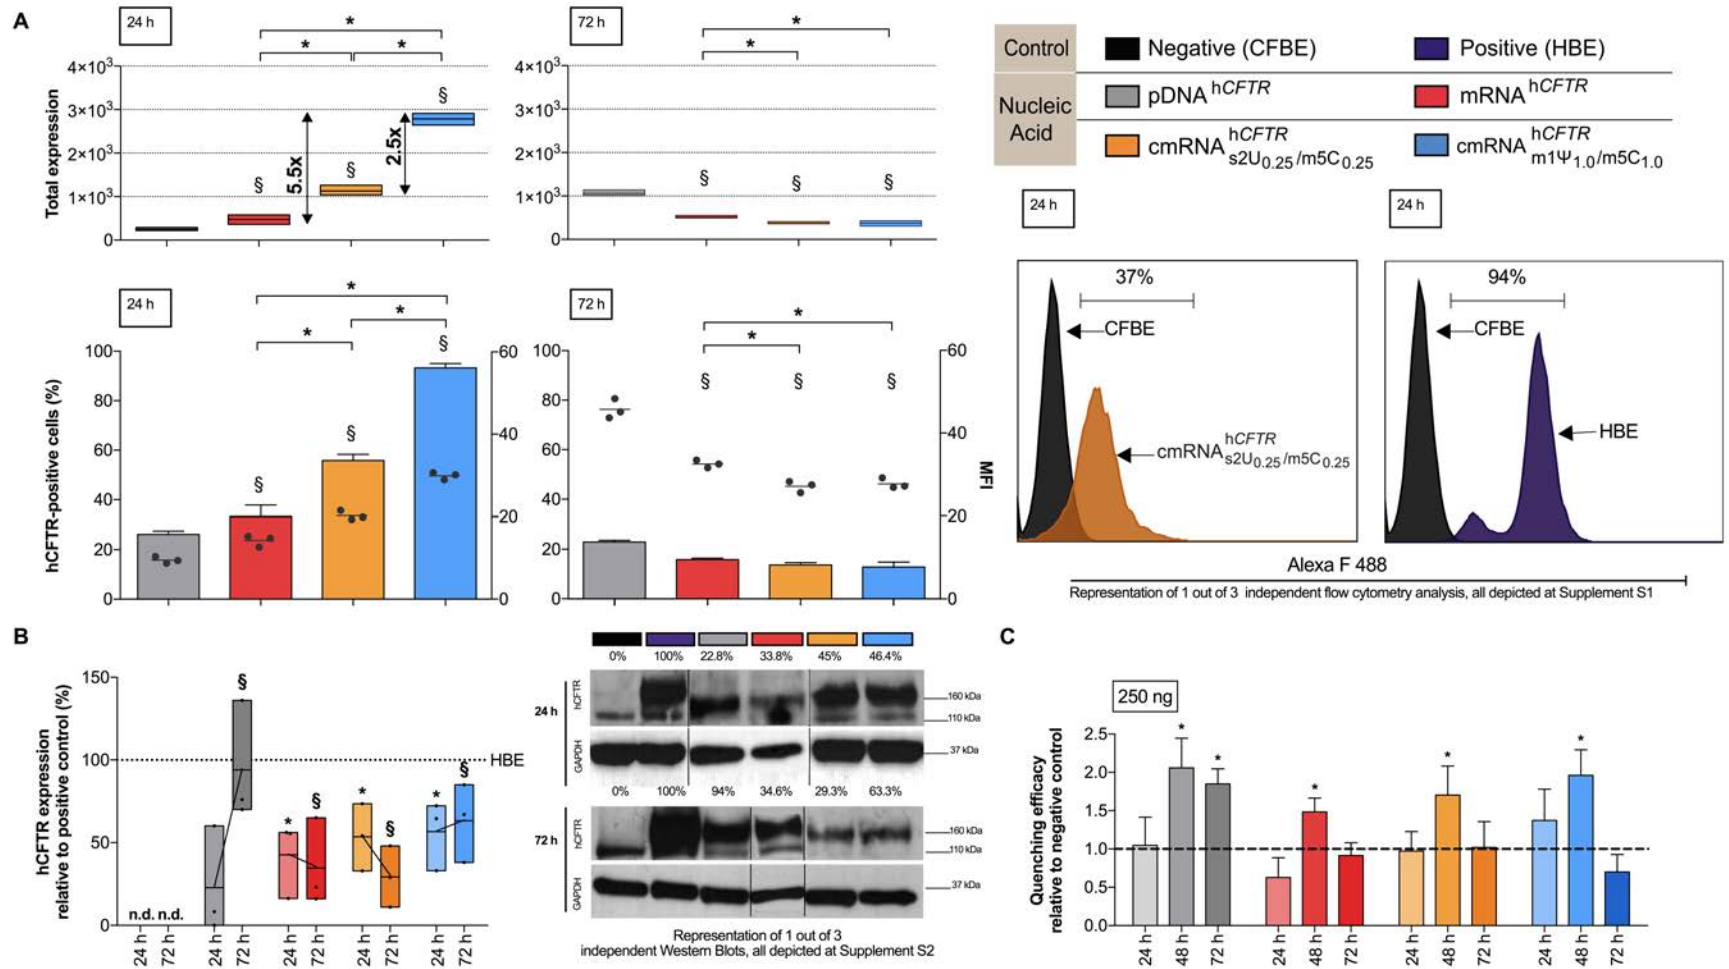

810 **Figure 2**

811

812

813

814

815

816

817

818

819

820

821

822

823

824

825

826

827

828

829

830

831

**A**

|              | CS-PLGA NPs                                                               |                     | Treatment                       | Analyses |
|--------------|---------------------------------------------------------------------------|---------------------|---------------------------------|----------|
|              | $\mu\text{g}$ ( <i>in vivo</i> )                                          | $\mu\text{g}$ (WBA) |                                 |          |
| Controls     | $Cftr^{-/-}$ / Blood only                                                 | —                   | n.a.                            | —        |
|              | <i>E. coli</i> (Total RNA)                                                | +                   | 40 i.v.                         | —        |
|              | R-848                                                                     | —                   | —                               | 20       |
| Mock         | 1 cmRNA <sup>hCFTR</sup> <sub>s2U<sub>0.25</sub>/m5C<sub>0.25</sub></sub> | —                   | 40 i.t.                         | n.a.     |
|              | 2 Nanoparticles (i.v.) [3 Nanoparticles (i.t.)                            | +                   | n.a.                            | —        |
| Nucleic Acid | pDNA <sup>hCFTR</sup>                                                     | +                   | 40 i.v. <sup>⊖</sup><br>80 i.t. | 20       |
|              | mRNA <sup>hCFTR</sup>                                                     | +                   | —                               | 20       |
|              | cmRNA <sup>hCFTR</sup> <sub>s2U<sub>0.25</sub>/m5C<sub>0.25</sub></sub>   | +                   | 40 i.v.                         | 20       |
|              | cmRNA <sup>hCFTR</sup> <sub>m1Ψ<sub>1.0</sub>/m5C<sub>1.0</sub></sub>     | +                   | 40 i.v.                         | 20       |
|              | cmRNA <sup>hCFTR</sup> <sub>s2U<sub>0.25</sub>/m5C<sub>0.25</sub></sub>   | +                   | 40 i.t.                         | —        |
|              | cmRNA <sup>hCFTR</sup> <sub>s2U<sub>0.25</sub>/m5C<sub>0.25</sub></sub>   | +                   | 80 i.t.                         | —        |

<sup>⊖</sup> pDNA has been equalised to mRNA by nmols instead of  $\mu\text{g}$

**B**

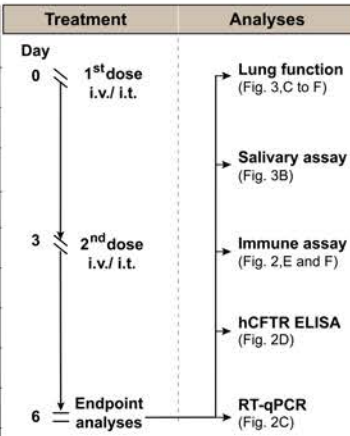

**C**

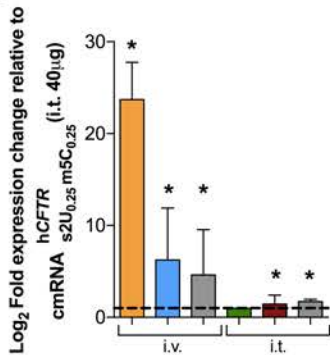

**D**

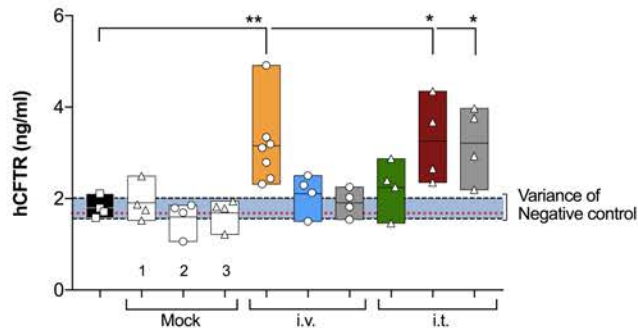

**E**

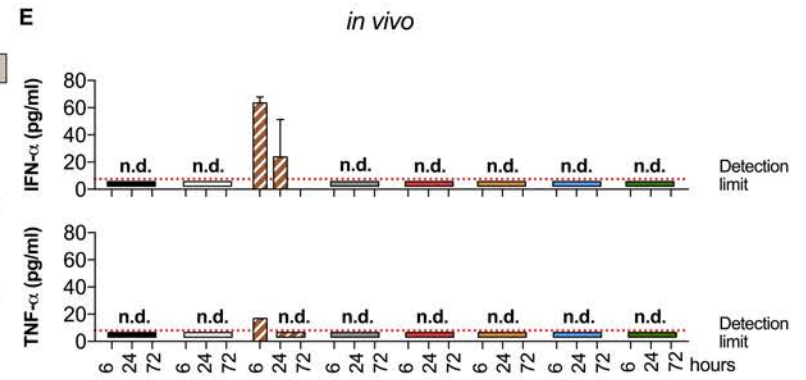

**F**

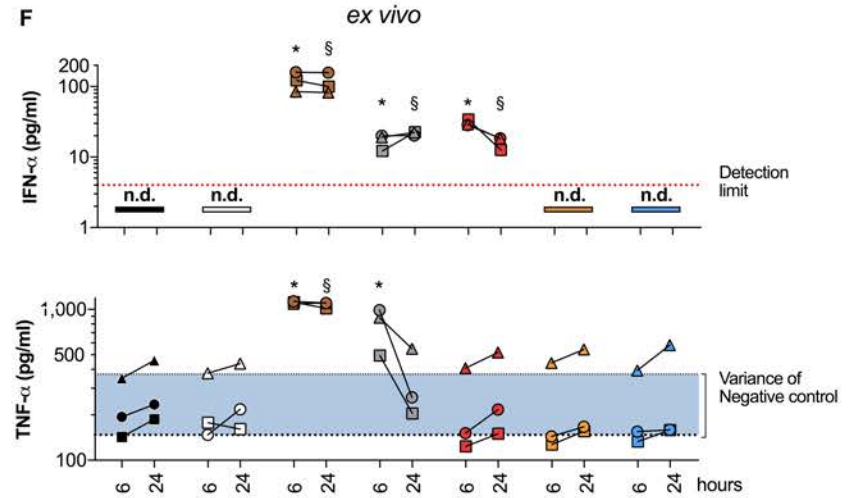

832 **Figure 3**

833  
834  
835  
836  
837  
838  
839  
840  
841  
842  
843  
844  
845  
846  
847  
848  
849  
850  
851  
852  
853  
854  
855  
856  
857  
858  
859  
860  
861  
862  
863  
864  
865  
866  
867  
868  
869  
870  
871  
872  
873  
874  
875  
876

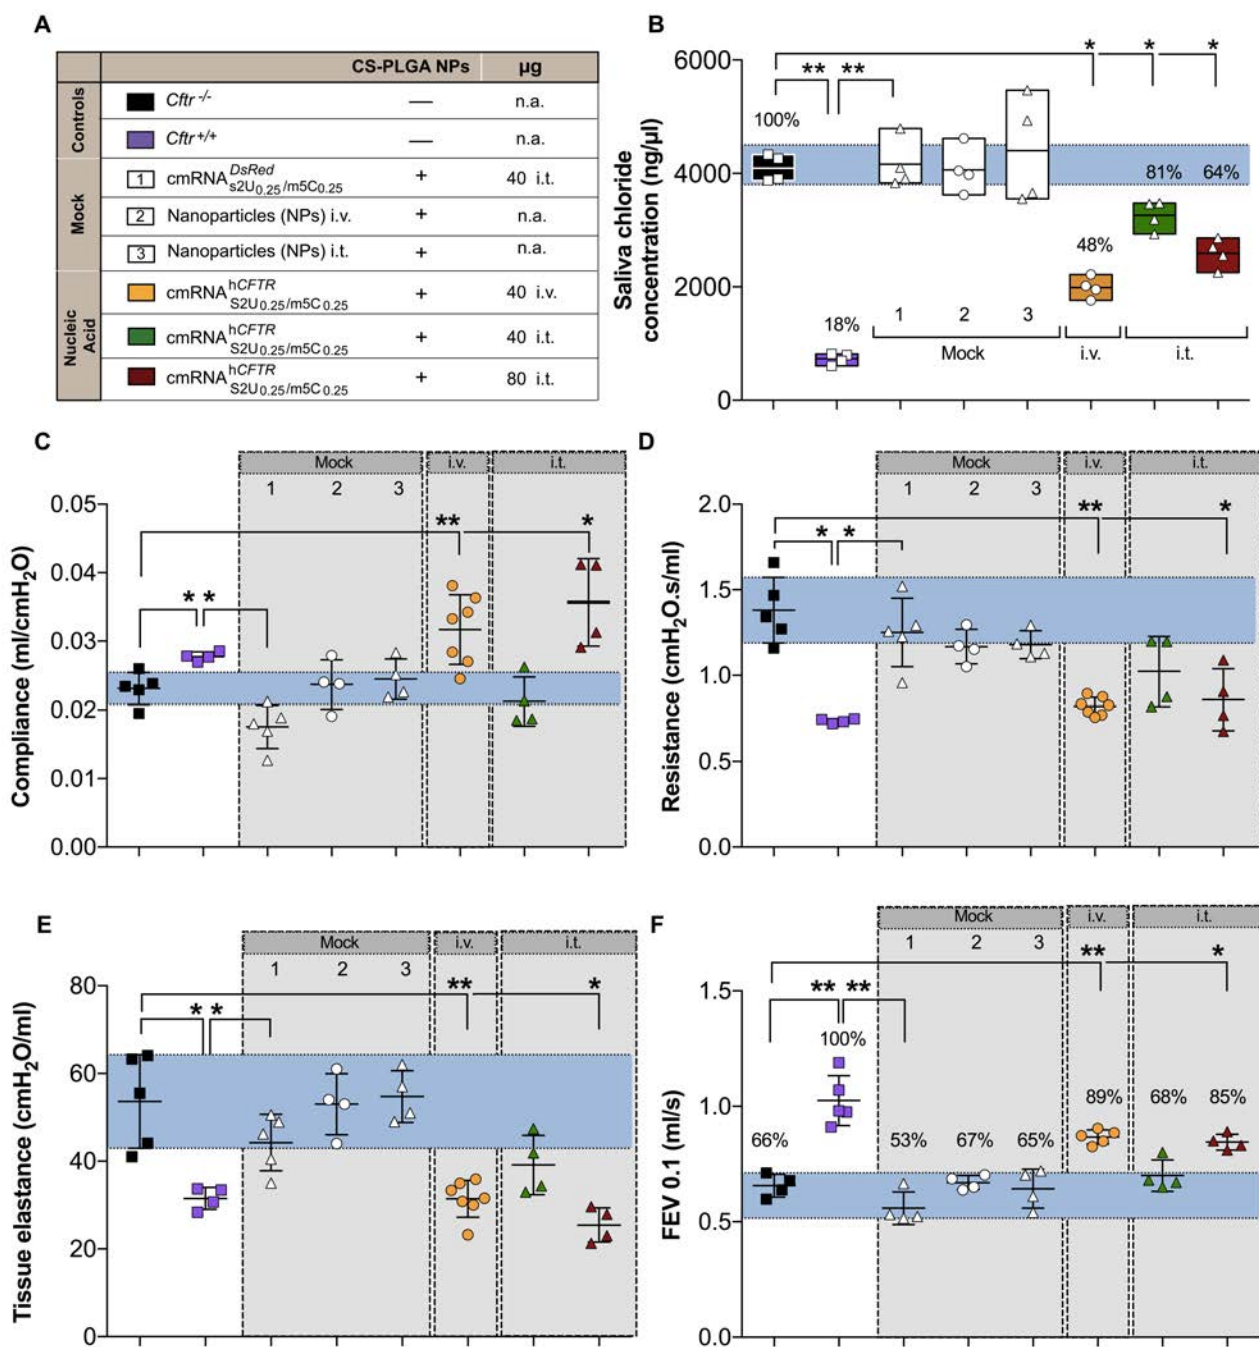



Figure 4

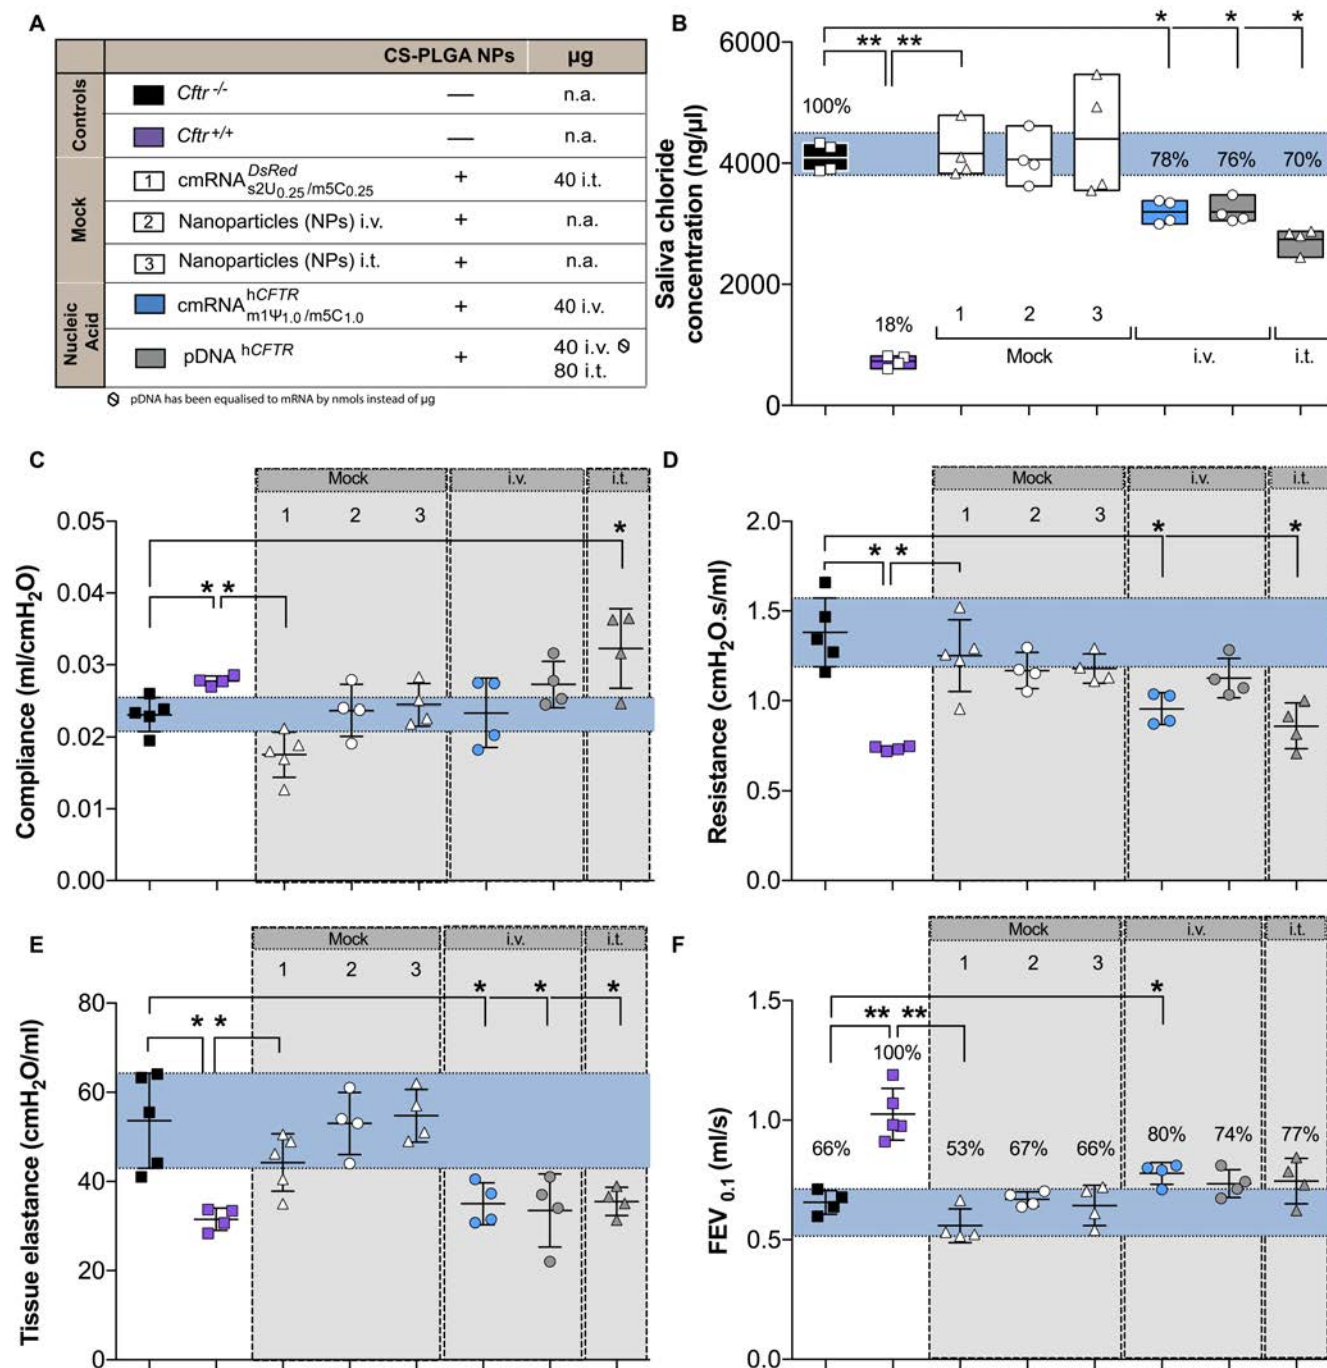

^

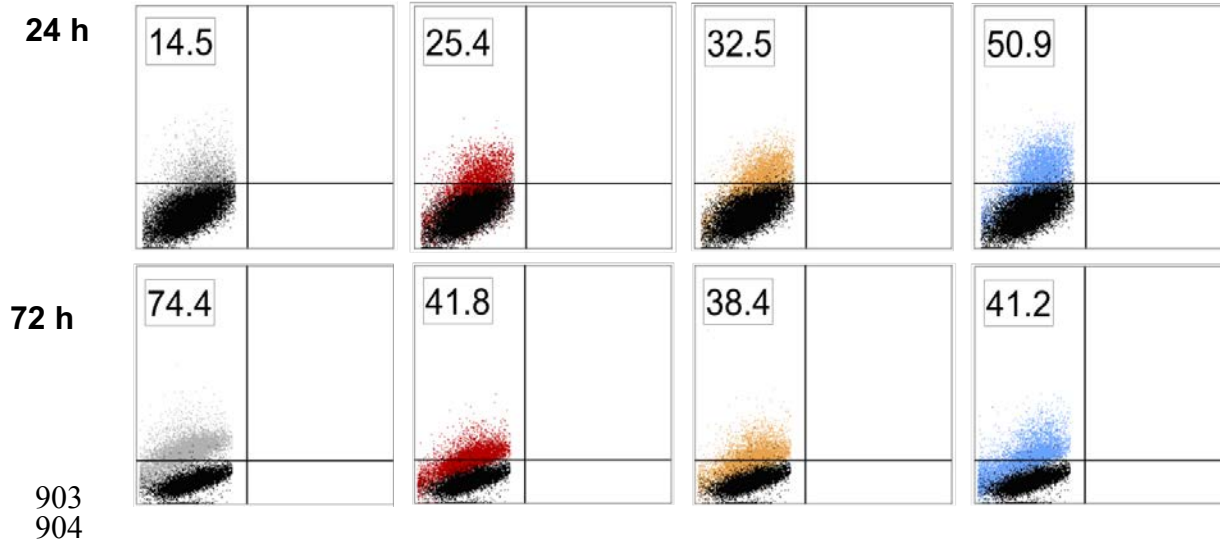

903  
904

| 24h | Treatment                                           | Sample # | % pos cells | MFI  | Total expression |
|-----|-----------------------------------------------------|----------|-------------|------|------------------|
|     | pDNAhCFTR                                           | 1        | 14,5        | 15,0 | 217,5            |
|     |                                                     | 2        | 15,6        | 15,5 | 241,8            |
|     |                                                     | 3        | 17,2        | 16,6 | 285,5            |
|     | mRNAhCFTR                                           | 1        | 25,4        | 22,8 | 579,1            |
|     |                                                     | 2        | 21,0        | 17,3 | 363,3            |
|     |                                                     | 3        | 24,6        | 19,9 | 489,5            |
|     | cmRNAhCFTR,s2U <sub>0.25</sub> /m5C <sub>0.25</sub> | 1        | 32,1        | 32,4 | 1040,0           |
|     |                                                     | 2        | 33,0        | 33,0 | 1089,0           |
|     |                                                     | 3        | 35,7        | 35,3 | 1260,2           |
|     | cmRNAhCFTR,N1Ψ <sub>1.0</sub> /m5C <sub>1.0</sub>   | 1        | 50,9        | 57,2 | 2911,5           |
|     |                                                     | 2        | 48,0        | 55,1 | 2644,8           |
|     |                                                     | 3        | 50,0        | 56,1 | 2805,0           |
| 72h | Treatment                                           | Sample # | % pos cells | MFI  | Total expression |
|     | pDNAhCFTR                                           | 1        | 80,6        | 14,2 | 1140,5           |
|     |                                                     | 2        | 72,9        | 13,8 | 1007,5           |
|     |                                                     | 3        | 75,3        | 13,4 | 1007,5           |
|     | mRNAhCFTR                                           | 1        | 52,7        | 9,3  | 488,0            |
|     |                                                     | 2        | 55,8        | 10,0 | 555,2            |
|     |                                                     | 3        | 54,2        | 9,4  | 507,3            |
|     | cmRNAhCFTR,s2U <sub>0.25</sub> /m5C <sub>0.25</sub> | 1        | 45,8        | 7,8  | 355,9            |
|     |                                                     | 2        | 42,6        | 8,0  | 372,3            |
|     |                                                     | 3        | 47,1        | 8,8  | 416,4            |
|     | cmRNAhCFTR,N1Ψ <sub>1.0</sub> /m5C <sub>1.0</sub>   | 1        | 48,6        | 7,9  | 385,4            |
|     |                                                     | 2        | 45,3        | 8,8  | 434,3            |
|     |                                                     | 3        | 44,8        | 6,4  | 305,6            |

905 **Fig. S1:** Expression analyses of hCFTR protein by flow cytometry; n=3

906



907 **Figure S2**

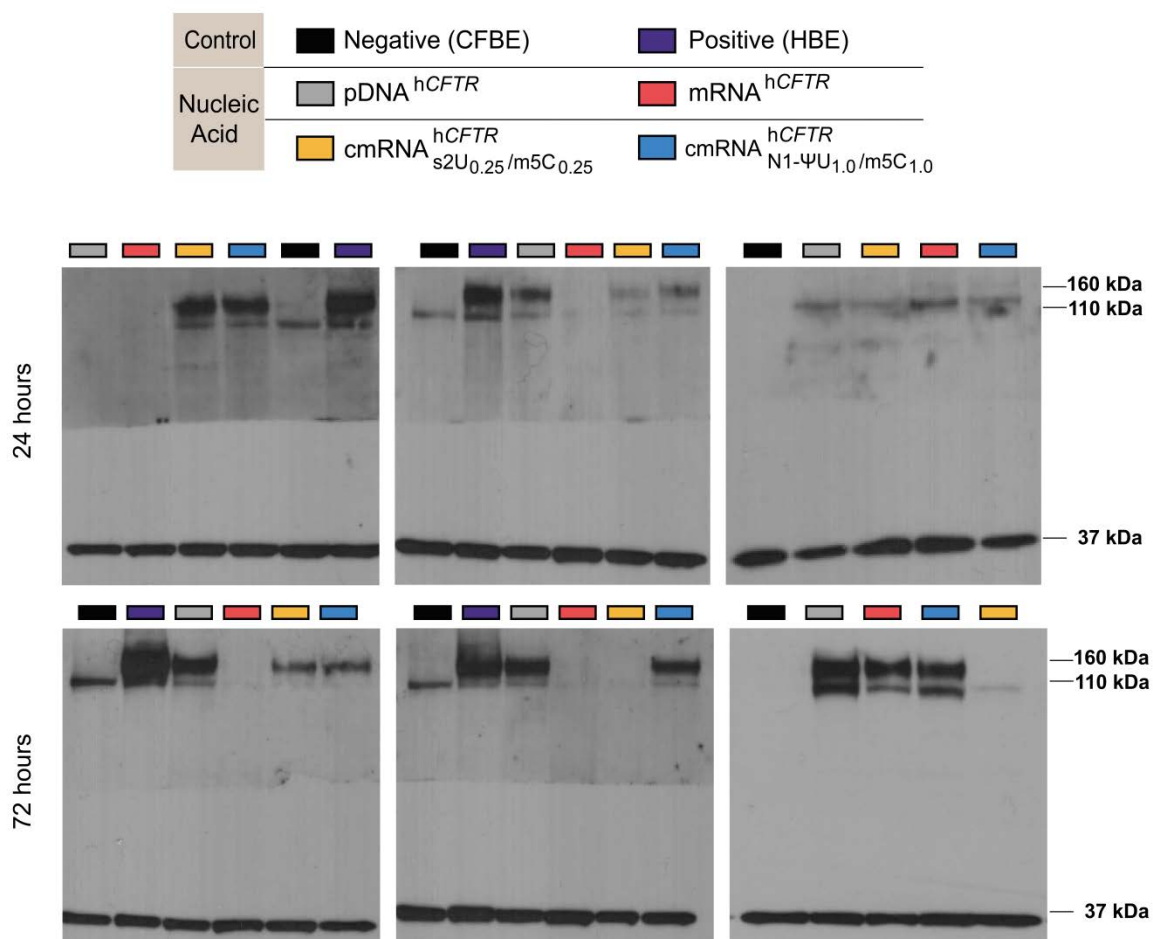

908

909 **Fig. S2:** Western blot analyses of hCFTR protein in CFBE and HBE cells; n=3.

^

## Source data:

### Figure 1A: Total expression, n=3, 24hour- Source 1

**Statistic:** Wilcoxon-Mann-Whitney test and  $P \leq 0.05$  was considered statistically significant

|                        |         |         |         | <b>P values<br/>(95% CI)</b> |
|------------------------|---------|---------|---------|------------------------------|
| hCFTR pDNA             | 210.50  | 241.80  | 285.52  | <b>N/A</b>                   |
| mRNA hCFTR             | 519.12  | 363.30  | 489.54  | <b>0.05</b>                  |
| cmRNA hCFTR<br>S2U_m5C | 1040.04 | 1089.40 | 1260.21 | <b>0.05</b>                  |
| cmRNA hCFTR<br>m1U_m5C | 2911.48 | 2644.80 | 2805.31 | <b>0.05</b>                  |

### Figure 1A: Total expression, n=3, 72hour- Source 2

**Statistic:** Wilcoxon-Mann-Whitney test and  $P \leq 0.05$  was considered statistically significant

|                        |         |         |         | <b>P values<br/>(95% CI)</b> |
|------------------------|---------|---------|---------|------------------------------|
| hCFTR pDNA             | 1140.49 | 1007.47 | 1007.51 | <b>N/A</b>                   |
| mRNA hCFTR             | 488.02  | 555.21  | 507.31  | <b>0.05</b>                  |
| cmRNA hCFTR<br>S2U_m5C | 355.86  | 372.33  | 416.36  | <b>0.05</b>                  |
| cmRNA hCFTR<br>m1U_m5C | 385.39  | 434.33  | 305.59  | <b>0.05</b>                  |

### Figure 1A : Median Fluorescence Intensity, n=3, 24hour- Source 3

**Statistic:** Wilcoxon-Mann-Whitney test and  $P \leq 0.05$  was considered statistically significant

|                        |      |      |      | <b>P values<br/>(95% CI)</b> |
|------------------------|------|------|------|------------------------------|
| hCFTR pDNA             | 15   | 15.5 | 16.6 | <b>N/A</b>                   |
| mRNA hCFTR             | 22.8 | 17.3 | 19.9 | <b>0.05</b>                  |
| cmRNA hCFTR<br>S2U_m5C | 32.4 | 33   | 35.3 | <b>0.05</b>                  |
| cmRNA hCFTR<br>m1U_m5C | 57.2 | 55.1 | 56.1 | <b>0.05</b>                  |

### Figure 1A: hCFTR Positive cell(%) n=3, 24hour- Source 4

**Statistic:** Wilcoxon-Mann-Whitney test and  $P \leq 0.05$  was considered statistically significant

|                        |      |      |      | <b>P values<br/>(95% CI)</b> |
|------------------------|------|------|------|------------------------------|
| hCFTR pDNA             | 14.5 | 15.6 | 17.2 | <b>N/A</b>                   |
| mRNA hCFTR             | 25.4 | 21   | 24.6 | <b>0.05</b>                  |
| cmRNA hCFTR<br>S2U_m5C | 32.1 | 33   | 35.7 | <b>0.05</b>                  |
| cmRNA hCFTR<br>m1U_m5C | 50.9 | 48   | 50   | <b>0.05</b>                  |

^

**Figure 1A:** Median Fluorescence Intensity, **n=3**, 72 hours- **Source 5**

**Statistic:** Wilcoxon-Mann-Whitney test and  $P \leq 0.05$  was considered statistically significant

|                        |       |       |       | <b>P values<br/>(95% CI)</b> |
|------------------------|-------|-------|-------|------------------------------|
| hCFTR pDNA             | 14.15 | 13.82 | 13.38 | <b>N/A</b>                   |
| mRNA hCFTR             | 9.26  | 9.95  | 9.36  | <b>0.05</b>                  |
| cmRNA hCFTR<br>S2U_m5C | 7.77  | 7.99  | 8.84  | <b>0.05</b>                  |
| cmRNA hCFTR<br>m1U_m5C | 7.93  | 8.81  | 6.42  | <b>0.05</b>                  |

**Figure 1A:** hCFTR Positive cells (%), **n=3**, 72 hours- **Source 6**

**Statistic:** Wilcoxon-Mann-Whitney test and  $P \leq 0.05$  was considered statistically significant

|                        |      |      |      | <b>P values<br/>(95% CI)</b> |
|------------------------|------|------|------|------------------------------|
| hCFTR pDNA             | 80.6 | 72.9 | 75.3 | <b>N/A</b>                   |
| mRNA hCFTR             | 52.7 | 55.8 | 54.2 | <b>0.05</b>                  |
| cmRNA hCFTR<br>S2U_m5C | 45.8 | 42.6 | 47.1 | <b>0.05</b>                  |
| cmRNA hCFTR<br>m1U_m5C | 48.6 | 45.3 | 44.8 | <b>0.05</b>                  |

**Figure 1B:** hCFTR expression by Western blot, **n=3**- **Source 7**

**Statistic:** Wilcoxon-Mann-Whitney test and  $P \leq 0.05$  was considered statistically significant

|                        | 24hours |       |       | <b>P value<br/>(95%CI)</b> | 72hours |    |    | <b>P value (95%CI)</b> |
|------------------------|---------|-------|-------|----------------------------|---------|----|----|------------------------|
| hCFTR pDNA             | 0       | 8.31  | 60.2  | <b>0.2</b>                 | 136     | 70 | 76 | <b>0.05</b>            |
| mRNA hCFTR             | 16.37   | 55.55 | 56.14 | <b>0.05</b>                | 65      | 16 | 23 | <b>0.05</b>            |
| cmRNA hCFTR<br>S2U_m5C | 73.6    | 32.93 | 54.19 | <b>0.05</b>                | 11      | 29 | 48 | <b>0.05</b>            |
| cmRNA hCFTR<br>m1U_m5C | 72.28   | 33.05 | 64.59 | <b>0.05</b>                | 85      | 38 | 67 | <b>0.05</b>            |

**Figure 1C:** YFP assay for CFTR function, **n=4** for each time point. **Source 8**

**Statistic:** Wilcoxon-Mann-Whitney test and  $P \leq 0.05$  (two-sided) was considered statistically significant

|                        | 24 hours |      |      |      | <b>P value<br/>(95%CI)</b> | 48 hours |      |      |      | <b>P value<br/>(95%CI)</b> | 72 hours |      |      |      | <b>P value<br/>(95%CI)</b> |
|------------------------|----------|------|------|------|----------------------------|----------|------|------|------|----------------------------|----------|------|------|------|----------------------------|
| hCFTR pDNA             | 0.86     | 1.48 | 1.18 | 0.64 | <b>0.99</b>                | 1.97     | 1.67 | 2.59 | 1.98 | <b>0.028</b>               | 1.61     | 2.04 | 1.76 | 1.97 | <b>0.028</b>               |
| mRNA hCFTR             | 0.58     | 0.89 | 0.29 | 0.74 | <b>NA</b>                  | 1.47     | 1.74 | 1.36 | 1.35 | <b>0.028</b>               | 0.93     | 0.95 | 1.08 | 0.68 | <b>0.3134</b>              |
| cmRNA hCFTR<br>S2U_m5C | 0.94     | 1.30 | 0.68 | 0.95 | <b>0.3134</b>              | 2.13     | 1.52 | 1.88 | 1.27 | <b>0.028</b>               | 0.78     | 1.22 | 0.68 | 1.38 | <b>0.99</b>                |
| cmRNA hCFTR<br>m1U_m5C | 1.79     | 1.55 | 0.83 | 1.30 | <b>0.3134</b>              | 1.53     | 2.09 | 1.88 | 2.32 | <b>0.028</b>               | 0.38     | 0.74 | 0.93 | 0.73 | <b>0.028</b>               |

^

**Figure 2A:** Expression fold change by qPCR. **Source 9**

**Statistic:** Wilcoxon-Mann-Whitney test and  $P \leq 0.05$  (two-sided) was considered statistically significant

|                                                                |       |       |       |      |  |            | <b>P value<br/>(95%CI)</b> |
|----------------------------------------------------------------|-------|-------|-------|------|--|------------|----------------------------|
| cmRNA hCFTR<br>S2U <sub>55</sub> m5C <sub>55</sub><br>40µgi.v. | 19.51 | 27.61 | 24.01 |      |  | <b>n=3</b> | <b>0.028</b>               |
| cmRNA hCFTR<br>m1U <sub>55</sub> m5C <sub>55</sub><br>40µgi.v. | 1.25  | 12.38 | 5.076 |      |  | <b>n=3</b> | <b>0.028</b>               |
| hCFTR pDNA i.v<br>40ug                                         | 10.03 | 3.39  | 0.43  |      |  | <b>n=3</b> | <b>0.028</b>               |
| cmRNA hCFTR<br>S2U <sub>55</sub> m5C <sub>55</sub><br>40µgi.t. | 1     | 1     | 1     |      |  | <b>n=3</b> | <b>N/A</b>                 |
| cmRNA hCFTR<br>S2U <sub>55</sub> m5C <sub>55</sub><br>80µgi.t. | 1.40  | 1.70  | 1.80  | 2.03 |  | <b>n=4</b> | <b>0.028</b>               |
| hCFTR pDNA i.t<br>80 ug                                        | 2.41  | 1.75  | 2.08  | 1.94 |  | <b>n=4</b> | <b>0.028</b>               |

**Figure 2B:** hCFTR Elisa. **Source 10**

**Statistic:** Wilcoxon-Mann-Whitney test and  $P \leq 0.05$  (two-sided) was considered statistically significant

|                                                                |      |      |      |      |      |      |            | <b>P value<br/>(95%CI)</b> |
|----------------------------------------------------------------|------|------|------|------|------|------|------------|----------------------------|
| <i>Cftr</i> <sup>-</sup>                                       | 1.58 | 1.71 | 2.11 | 1.79 |      |      | <b>n=4</b> | <b>N/A</b>                 |
| cmRNA DsRed<br>S2U <sub>55</sub> m5C <sub>55</sub><br>40µgi.t. | 1.75 | 1.52 | 1.87 | 2.49 |      |      | <b>n=4</b> | <b>0.88</b>                |
| Nanoparticles (NPs)<br>i.v.                                    | 1.85 | 1.79 | 1.06 | 1.69 |      |      | <b>n=4</b> | <b>0.88</b>                |
| Nanoparticles (NPs)<br>i.t.                                    | 1.81 | 1.94 | 1.21 | 1.78 |      |      | <b>n=4</b> | <b>0.88</b>                |
| cmRNA hCFTR<br>S2U <sub>55</sub> m5C <sub>55</sub><br>40µgi.v. | 2.79 | 2.44 | 4.91 | 3.19 | 3.34 | 2.32 | <b>n=5</b> | <b>0.0061</b>              |
| cmRNA hCFTR<br>m1U <sub>55</sub> m5C <sub>55</sub><br>40µgi.v. | 2.29 | 2.54 | 1.50 | 2.50 |      |      | <b>n=4</b> | <b>0.3429</b>              |
| pDNA hCFTR 40µg<br>i.v.                                        | 2.25 | 2.02 | 1.54 | 1.81 |      |      | <b>n=4</b> | <b>0.6857</b>              |
| cmRNA hCFTR<br>S2U <sub>55</sub> m5C <sub>55</sub><br>40µgi.t. | 1.46 | 2.25 | 2.39 | 2.87 |      |      | <b>n=4</b> | <b>0.3429</b>              |
| cmRNA hCFTR<br>S2U <sub>55</sub> m5C <sub>55</sub><br>80µgi.t. | 2.65 | 4.35 | 3.67 | 2.35 |      |      | <b>n=4</b> | <b>0.0286</b>              |
| pDNA hCFTR 80µg<br>i.t.                                        | 3.75 | 2.93 | 2.19 | 3.97 |      |      | <b>n=4</b> | <b>0.0286</b>              |

^

**Figure 2C: Immune Assay INF-Alpha *in vivo*, n=4 for each time point. Source 11**

**Statistic:** Wilcoxon-Mann-Whitney test and  $P \leq 0.05$  (two-sided) was considered statistically significant

**No Significant P value can be measured**

|                                              | 6 hours |       |       |       | 24 hours |       |   |   | 72 hours |   |   |   |
|----------------------------------------------|---------|-------|-------|-------|----------|-------|---|---|----------|---|---|---|
| <i>Cftr</i> -                                | 0       | 0     | 0     | 0     | 0        | 0     | 0 | 0 | 0        | 0 | 0 | 0 |
| Nanoparticles (NPs) i.v.                     | 0       | 0     | 0     | 0     | 0        | 0     | 0 | 0 | 0        | 0 | 0 | 0 |
| <i>E.coli</i>                                | 61.05   | 63.91 | 69.62 | 59.48 | 45.97    | 49.25 | 0 | 0 | 0        | 0 | 0 | 0 |
| pDNA hCFTR 40µgi.v.                          | 0       | 0     | 0     | 0     | 0        | 0     | 0 | 0 | 0        | 0 | 0 | 0 |
| mRNA hCFTR 40µgi.v.                          | 0       | 0     | 0     | 0     | 0        | 0     | 0 | 0 | 0        | 0 | 0 | 0 |
| cmRNA hCFTR S2U_m5C <sub>500</sub> 40µgi.v   | 0       | 0     | 0     | 0     | 0        | 0     | 0 | 0 | 0        | 0 | 0 | 0 |
| cmRNA hCFTR m1U_m5C <sub>500</sub> 40 µgi.v. | 0       | 0     | 0     | 0     | 0        | 0     | 0 | 0 | 0        | 0 | 0 | 0 |
| cmRNA hCFTR S2U_m5C <sub>500</sub> 40µgi.v.  | 0       | 0     | 0     | 0     | 0        | 0     | 0 | 0 | 0        | 0 | 0 | 0 |

**Figure 2C: Immune Assay TNF-Alpha *in vivo*, n=4 for each time point. Source 12**

**Statistic:** Wilcoxon-Mann-Whitney test and  $P \leq 0.05$  (two-sided) was considered statistically significant

**No Significant P value can be measured**

|                                              | 6 hours |       |       |       | 24 hours |   |   |   | 72 hours |   |   |   |
|----------------------------------------------|---------|-------|-------|-------|----------|---|---|---|----------|---|---|---|
| <i>Cftr</i> -                                | 0       | 0     | 0     | 0     | 0        | 0 | 0 | 0 | 0        | 0 | 0 | 0 |
| Nanoparticles (NPs) i.v.                     | 0       | 0     | 0     | 0     | 0        | 0 | 0 | 0 | 0        | 0 | 0 | 0 |
| <i>E.coli</i>                                | 17.21   | 15.70 | 17.68 | 16.98 | 0        | 0 | 0 | 0 | 0        | 0 | 0 | 0 |
| pDNA hCFTR 40µgi.v.                          | 0       | 0     | 0     | 0     | 0        | 0 | 0 | 0 | 0        | 0 | 0 | 0 |
| mRNA hCFTR 40µgi.v.                          | 0       | 0     | 0     | 0     | 0        | 0 | 0 | 0 | 0        | 0 | 0 | 0 |
| cmRNA hCFTR S2U_m5C <sub>500</sub> 40µgi.v   | 0       | 0     | 0     | 0     | 0        | 0 | 0 | 0 | 0        | 0 | 0 | 0 |
| cmRNA hCFTR m1U_m5C <sub>500</sub> 40 µgi.v. | 0       | 0     | 0     | 0     | 0        | 0 | 0 | 0 | 0        | 0 | 0 | 0 |
| cmRNA hCFTR S2U_m5C <sub>500</sub> 40µgi.v.  | 0       | 0     | 0     | 0     | 0        | 0 | 0 | 0 | 0        | 0 | 0 | 0 |

**Figure 2D : Whole blood assay INF-Alpha (*ex vivo*) Donor (n=3) Source 13**

**Statistic:** Wilcoxon-Mann-Whitney test and  $P \leq 0.05$  (two-sided) was considered statistically significant

| Donor 1    | 6 hours |        | P value (95%CI) | 24 hours |       | P value (95%CI) |
|------------|---------|--------|-----------------|----------|-------|-----------------|
| Blood      | 0       | 0      | N/A             | 0        | 0     | N/A             |
| NP         | 0       | 0      | N/A             | 0        | 0     | N/A             |
| R848       | 125.63  | 119.24 | 0.05            | 103.69   | 96.63 | 0.05            |
| pDNA hCFTR | 7.80    | 16.56  | 0.05            | 23.58    | 21.69 | 0.05            |
| mRNA hCFTR | 35.64   | 32.63  | 0.05            | 12.25    | 13.03 | 0.05            |

^

|                        |   |   |     |   |   |     |
|------------------------|---|---|-----|---|---|-----|
| cmRNA hCFTR<br>S2U_m5C | 0 | 0 | N/A | 0 | 0 | N/A |
| cmRNA hCFTR<br>m1U_m5C | 0 | 0 | N/A | 0 | 0 | N/A |

| Donor 2                | 6 hours |        | P value<br>(95%CI) | 24 hours |        | P value (95%CI) |
|------------------------|---------|--------|--------------------|----------|--------|-----------------|
| Blood                  | 0       | 0      | N/A                | 0        | 0      | N/A             |
| NP                     | 0       | 0      | N/A                | 0        | 0      | N/A             |
| R848                   | 188.43  | 134.90 | <b>0.05</b>        | 151.87   | 165.95 | <b>0.05</b>     |
| pDNA hCFTR             | 21.74   | 19.05  | <b>0.05</b>        | 21.37    | 19.49  | <b>0.05</b>     |
| mRNA hCFTR             | 29.77   | 27.63  | <b>0.05</b>        | 15.84    | 21.71  | <b>0.05</b>     |
| cmRNA hCFTR<br>S2U_m5C | 0       | 0      | N/A                | 0        | 0      | N/A             |
| cmRNA hCFTR<br>m1U_m5C | 0       | 0      | N/A                | 0        | 0      | N/A             |

| Donor 3                | 6 hours |       | P value<br>(95%CI) | 24 hours |       | P value (95%CI) |
|------------------------|---------|-------|--------------------|----------|-------|-----------------|
| Blood                  | 0       | 0     | N/A                | 0        | 0     | N/A             |
| NP                     | 0       | 0     | N/A                | 0        | 0     | N/A             |
| R848                   | 95.20   | 74.16 | <b>0.05</b>        | 90.74    | 73.63 | <b>0.05</b>     |
| pDNA hCFTR             | 19.70   | 18.63 | <b>0.05</b>        | 17.89    | 26.93 | <b>0.05</b>     |
| mRNA hCFTR             | 26.89   | 31.32 | <b>0.05</b>        | 15.62    | 21.32 | <b>0.05</b>     |
| cmRNA hCFTR<br>S2U_m5C | 0       | 0     | N/A                | 0        | 0     | N/A             |
| cmRNA hCFTR<br>m1U_m5C | 0       | 0     | N/A                | 0        | 0     | N/A             |

**Figure 2D** : Whole blood assay TNF-Alpha (*ex vivo*) Donor (n=3) Source 14

**Statistic:** Wilcoxon-Mann-Whitney test and  $P \leq 0.05$  (two-sided) was considered statistically significant

| Donor 1                | 6 hours |         | P value<br>(95%CI) | 24 hours |         | P value<br>(95%CI) |
|------------------------|---------|---------|--------------------|----------|---------|--------------------|
| Blood                  | 143.96  | 141.98  | N/A                | 186.11   | 187.60  | N/A                |
| NP                     | 174.47  | 179.94  | <b>0.99</b>        | 159.82   | 162.08  | <b>0.99</b>        |
| R848                   | 1120.90 | 1112.60 | <b>0.05</b>        | 1007.07  | 1021.46 | <b>0.05</b>        |
| pDNA hCFTR             | 459.40  | 531.17  | <b>0.05</b>        | 200.94   | 207.50  | <b>0.70</b>        |
| mRNA hCFTR             | 116.81  | 130.23  | <b>0.99</b>        | 153.08   | 147.37  | <b>0.99</b>        |
| cmRNA hCFTR<br>S2U_m5C | 121.79  | 132.26  | <b>0.99</b>        | 152.85   | 158.69  | <b>0.99</b>        |
| cmRNA hCFTR<br>m1U_m5C | 125.89  | 140.19  | <b>0.99</b>        | 154.47   | 162.27  | <b>0.99</b>        |

| Donor 2    | 6 hours |         | P value<br>(95%CI) | 24 hours |        | P value<br>(95%CI) |
|------------|---------|---------|--------------------|----------|--------|--------------------|
| Blood      | 193.33  | 193.47  | N/A                | 231.80   | 235.07 | N/A                |
| NP         | 146.65  | 147.56  | <b>0.99</b>        | 211.78   | 221.70 | <b>0.99</b>        |
| R848       | 1126.01 | 1124.93 | <b>0.05</b>        | 1095.66  | 1100.5 | <b>0.05</b>        |
| pDNA hCFTR | 983.81  | 982.88  | <b>0.05</b>        | 259.15   | 260.60 | <b>0.99</b>        |
| mRNA hCFTR | 148.08  | 153.05  | <b>0.99</b>        | 223.90   | 208.53 | <b>0.99</b>        |

^

|                        |        |        |             |        |        |             |
|------------------------|--------|--------|-------------|--------|--------|-------------|
| cmRNA hCFTR<br>S2U_m5C | 142.29 | 143.81 | <b>0.99</b> | 167.02 | 164.55 | <b>0.99</b> |
| cmRNA hCFTR<br>m1U_m5C | 153.86 | 155.00 | <b>0.99</b> | 164.18 | 153.43 | <b>0.99</b> |

| Donor 3                | 6 hours |         | P value<br>(95%CI) | 24 hours |         | P value<br>(95%CI) |
|------------------------|---------|---------|--------------------|----------|---------|--------------------|
| Blood                  | 346.41  | 344.34  | <b>N/A</b>         | 459.53   | 450.27  | <b>N/A</b>         |
| NP                     | 366.34  | 380.61  | <b>0.99</b>        | 403.56   | 460.78  | <b>0.99</b>        |
| R848                   | 1079.81 | 1088.11 | <b>0.05</b>        | 1111.01  | 1084.73 | <b>0.05</b>        |
| pDNA hCFTR             | 867.98  | 887.78  | <b>0.05</b>        | 536.78   | 552.76  | <b>0.99</b>        |
| mRNA hCFTR             | 401.89  | 404.76  | <b>0.99</b>        | 484.33   | 544.94  | <b>0.99</b>        |
| cmRNA hCFTR<br>S2U_m5C | 413.58  | 462.21  | <b>0.99</b>        | 537.38   | 537.27  | <b>0.99</b>        |
| cmRNA hCFTR<br>m1U_m5C | 372.28  | 407.73  | <b>0.99</b>        | 582.94   | 569.24  | <b>0.99</b>        |

**Figure 3B:** Salivary Chloride assay, n=4: **Source 15**

**Statistic:** Wilcoxon-Mann-Whitney test and  $P \leq 0.05$  (two-sided) was considered statistically significant

|                                      |         |         |         |         | P value<br>(95%CI) |
|--------------------------------------|---------|---------|---------|---------|--------------------|
| <i>Cftr</i> <sup>-</sup>             | 4263.55 | 3876.60 | 4331.90 | 3905.40 | <b>N/A</b>         |
| <i>Cftr</i> <sup>-</sup>             | 797.33  | 699.35  | 819.34  | 608.47  | <b>0.028</b>       |
| cmRNA DsRed<br>S2U_m5C<br>40 µg i.v. | 4103.80 | 3912.10 | 4792.50 | 3834.76 | <b>0.99</b>        |
| Nanoparticles<br>(NPs) i.v.          | 4615.20 | 3976.31 | 4047.64 | 3621.93 | <b>0.99</b>        |
| Nanoparticles<br>(NPs) i.t.          | 3656.50 | 4934.50 | 5467.91 | 3550.96 | <b>0.99</b>        |
| cmRNA hCFTR<br>S2U_m5C 40 µg<br>i.v. | 1764.35 | 2016.40 | 1952.50 | 2218.75 | <b>0.028</b>       |
| cmRNA hCFTR<br>S2U_m5C 40 µg<br>i.t. | 3187.90 | 2931.59 | 3479.70 | 3461.25 | <b>0.028</b>       |
| cmRNA hCFTR<br>S2U_m5C 80 µg<br>i.t. | 2252.97 | 2553.87 | 2862.01 | 2698.51 | <b>0.028</b>       |

**Figure 3C:** Lung Compliance. **Source Data 16**

**Statistic:** Wilcoxon-Mann-Whitney test and  $P \leq 0.05$  (two-sided) was considered statistically significant

|                          |         |         |         |         |        |   |  |     | P value<br>(95%CI) |
|--------------------------|---------|---------|---------|---------|--------|---|--|-----|--------------------|
| <i>Cftr</i> <sup>-</sup> | 0.01951 | 0.02338 | 0.02288 | 0.02380 | 0.0269 | 0 |  | n=5 | <b>N/A</b>         |

^

|                                                                    |         |         |         |         |             |         |         |     |                  |
|--------------------------------------------------------------------|---------|---------|---------|---------|-------------|---------|---------|-----|------------------|
| <i>Cftr</i> <sup>-</sup>                                           | 0.02857 | 0.02767 | 0.02693 | 0.02780 |             |         |         | n=4 | 0.0159<br>/0.159 |
| cmRNA DsRed<br>S2U <sub>...</sub> m5C <sub>...</sub><br>40 μgi.v   | 0.01803 | 0.01891 | 0.02122 | 0.01692 | 0.0126<br>7 |         |         | n=5 | 0.0159           |
| Nanoparticles<br>(NPs) i.v.                                        | 0.01910 | 0.02403 | 0.02376 | 0.02787 |             |         |         | n=4 | 0.7302           |
| Nanoparticles<br>(NPs) i.t.                                        | 0.02833 | 0.02183 | 0.02258 | 0.02518 |             |         |         | n=4 | 0.9048           |
| cmRNA hCFTR<br>S2U <sub>...</sub> m5C <sub>...</sub> 40 μg<br>i.v. | 0.03629 | 0.02453 | 0.03325 | 0.03424 | 0.0380<br>9 | 0.02841 | 0.02700 | n=7 | 0.0051           |
| cmRNA hCFTR<br>S2U <sub>...</sub> m5C <sub>...</sub> 40 μg<br>i.t. | 0.01874 | 0.01854 | 0.02621 | 0.02136 |             |         |         | n=4 | 0.4127           |
| cmRNA hCFTR<br>S2U <sub>...</sub> m5C <sub>...</sub> 80 μg<br>i.t. | 0.04120 | 0.04109 | 0.02912 | 0.03129 |             |         |         | n=4 | 0.0159           |

**Figure 3D:** Lung Resistance. **Source 17**

**Statistic:** Wilcoxon-Mann-Whitney test and  $P \leq 0.05$  (two-sided) was considered statistically significant

|                                                                    |         |         |         |         |         |         |         |     | P value<br>(95%CI) |
|--------------------------------------------------------------------|---------|---------|---------|---------|---------|---------|---------|-----|--------------------|
| <i>Cftr</i> <sup>-</sup>                                           | 1.65944 | 1.34315 | 1.46782 | 1.27120 | 1.16761 |         |         | n=5 | N/A                |
| <i>Cftr</i> <sup>-</sup>                                           | 0.73260 | 0.72022 | 0.74576 | 0.74889 |         |         |         | n=4 | 0.0159<br>/0.0159  |
| cmRNA DsRed<br>S2U <sub>...</sub> m5C <sub>...</sub><br>40 μgi.v   | 1.52008 | 0.95717 | 1.29285 | 1.22658 | 1.25748 |         |         | n=5 | 0.4206             |
| Nanoparticles<br>(NPs) i.v.                                        | 1.17250 | 1.05098 | 1.15327 | 1.29601 |         |         |         | n=4 | 0.111              |
| Nanoparticles<br>(NPs) i.t.                                        | 1.10923 | 1.18400 | 1.13412 | 1.29250 |         |         |         | n=4 | 0.111              |
| cmRNA hCFTR<br>S2U <sub>...</sub> m5C <sub>...</sub> 40 μg<br>i.v. | 0.87531 | 0.78846 | 0.89476 | 0.77062 | 0.75756 | 0.82743 | 0.83438 | n=7 | 0.0025             |
| cmRNA hCFTR<br>S2U <sub>...</sub> m5C <sub>...</sub> 40 μg<br>i.t. | 0.81922 | 1.19989 | 1.19767 | 0.87647 |         |         |         | n=4 | 0.0635             |
| cmRNA hCFTR<br>S2U <sub>...</sub> m5C <sub>...</sub> 80 μg<br>i.t. | 0.67500 | 0.76931 | 1.08940 | 0.90550 |         |         |         | n=4 | 0.0159             |

**Figure 3E:** Tissue Elastance. **Source Data 18**

**Statistic:** Wilcoxon-Mann-Whitney test and  $P \leq 0.05$  (two-sided) was considered statistically significant

|                                                      |       |       |       |       |       |  |  |     | P value<br>(95%CI) |
|------------------------------------------------------|-------|-------|-------|-------|-------|--|--|-----|--------------------|
| <i>Cftr</i> <sup>-</sup>                             | 64.12 | 41.06 | 44.07 | 55.52 | 63.26 |  |  | n=5 | N/A                |
| <i>Cftr</i> <sup>-</sup>                             | 28.36 | 33.40 | 33.67 | 30.68 |       |  |  | n=4 | 0.0159<br>/0.0159  |
| cmRNA DsRed<br>S2U <sub>...</sub> m5C <sub>...</sub> | 48.93 | 50.57 | 35.04 | 46.23 | 40.47 |  |  | n=5 | 0.222              |



^

|                                                              |       |       |       |       |       |       |       |     |               |
|--------------------------------------------------------------|-------|-------|-------|-------|-------|-------|-------|-----|---------------|
| 40 µg i.v.                                                   |       |       |       |       |       |       |       |     |               |
| Nanoparticles (NPs) i.v.                                     | 53.65 | 61.42 | 44.21 | 54.56 |       |       |       | n=4 | <b>0.7302</b> |
| Nanoparticles (NPs) i.t.                                     | 57.40 | 62.43 | 49.50 | 51.20 |       |       |       | n=4 | <b>0.999</b>  |
| cmRNA hCFTR S2U <sub>...</sub> m5C <sub>...</sub> 40 µg i.v. | 30.03 | 31.58 | 34.95 | 33.39 | 35.88 | 30.85 | 23.25 | n=7 | <b>0.0025</b> |
| cmRNA hCFTR S2U <sub>...</sub> m5C <sub>...</sub> 40 µg i.t. | 32.94 | 34.33 | 47.41 | 41.88 |       |       |       | n=4 | <b>0.111</b>  |
| cmRNA hCFTR S2U <sub>...</sub> m5C <sub>...</sub> 80 µg i.t. | 21.30 | 23.05 | 27.86 | 29.61 |       |       |       | n=4 | <b>0.0159</b> |

**Figure 3F: FEV<sub>1</sub> Source Data 19**

**Statistic:** Wilcoxon-Mann-Whitney test and  $P \leq 0.05$  was considered statistically significant

|                                                              |       |       |       |       |       |  |     | <b>P value (95%CI)</b> |
|--------------------------------------------------------------|-------|-------|-------|-------|-------|--|-----|------------------------|
| <i>Cftr</i> <sup>-</sup>                                     | 0.598 | 0.678 | 0.712 | 0.638 |       |  | n=5 | <b>N/A</b>             |
| <i>Cftr</i> <sup>-</sup>                                     | 0.910 | 0.975 | 1.190 | 1.071 | 0.980 |  | n=4 | <b>0.0079 /0.0079</b>  |
| cmRNA DsRed S2U <sub>...</sub> m5C <sub>...</sub> 40 µg i.v. | 0.515 | 0.532 | 0.665 | 0.523 |       |  | n=5 | <b>0.0571</b>          |
| Nanoparticles (NPs) i.v.                                     | 0.686 | 0.703 | 0.638 | 0.650 |       |  | n=4 | <b>0.3858</b>          |
| Nanoparticles (NPs) i.t.                                     | 0.610 | 0.542 | 0.703 | 0.721 |       |  | n=4 | <b>0.500</b>           |
| cmRNA hCFTR S2U <sub>...</sub> m5C <sub>...</sub> 40 µg i.v. | 0.873 | 0.825 | 0.849 | 0.886 | 0.904 |  | n=5 | <b>0.0079</b>          |
| cmRNA hCFTR S2U <sub>...</sub> m5C <sub>...</sub> 40 µg i.t. | 0.655 | 0.672 | 0.689 | 0.834 |       |  | n=4 | <b>0.2429</b>          |
| cmRNA hCFTR S2U <sub>...</sub> m5C <sub>...</sub> 80 µg i.t. | 0.830 | 0.895 | 0.851 | 0.810 |       |  | n=4 | <b>0.0143</b>          |

**Figure 4B. Salivary Assay, n=4: Source Data 20**

**Statistic:** Wilcoxon-Mann-Whitney test and  $P \leq 0.05$  (two-sided) was considered statistically significant

|                                                              |         |         |         |         | <b>P value (95%CI)</b> |
|--------------------------------------------------------------|---------|---------|---------|---------|------------------------|
| <i>Cftr</i> <sup>-</sup>                                     | 4263.55 | 3876.60 | 4331.20 | 3905.00 | <b>N/A</b>             |
| <i>Cftr</i> <sup>-</sup>                                     | 797.33  | 699.35  | 819.34  | 608.47  | <b>0.028</b>           |
| cmRNA DsRed S2U <sub>...</sub> m5C <sub>...</sub> 40 µg i.v. | 4103.80 | 3912.10 | 4792.50 | 3834.70 | <b>0.99</b>            |
| Nanoparticles (NPs) i.v.                                     | 4615.31 | 3976.77 | 4047.40 | 3621.51 | <b>0.99</b>            |

^

|                                                           |         |         |         |          |               |
|-----------------------------------------------------------|---------|---------|---------|----------|---------------|
| Nanoparticles (NPs) i.t.                                  | 3656.50 | 4934.50 | 5467.30 | 3550.51  | <b>0.99</b>   |
| cmRNA hCFTR m1U <sub>14</sub> m5C <sub>14</sub> 40 µgi.v. | 3383.15 | 3059.39 | 2999.75 | 3345.875 | <b>0.0286</b> |
| pDNA hCFTR 40 µgi.v.                                      | 3088.50 | 3479.99 | 3159.52 | 3053.40  | <b>0.0286</b> |
| pDNA hCFTR 80 µgi.t.                                      | 2875.56 | 2804.50 | 2840.38 | 2449.50  | <b>0.0286</b> |

**Figure 4C : Lung Compliance. Source Data 21**

**Statistic:** Wilcoxon-Mann-Whitney test and  $P \leq 0.05$  (two-sided) was considered statistically significant

|                                                           |         |         |         |         |         |            | <b>P value (95%CI)</b> |
|-----------------------------------------------------------|---------|---------|---------|---------|---------|------------|------------------------|
| <i>Cftr</i> <sup>-/-</sup>                                | 0.01951 | 0.02338 | 0.02288 | 0.02380 | 0.02670 | <b>n=5</b> | <b>N/A</b>             |
| <i>Cftr</i> <sup>-/-</sup>                                | 0.02857 | 0.02767 | 0.02693 | 0.02780 |         | <b>n=4</b> | <b>0.0159 /0.159</b>   |
| cmRNA DsRed S2U <sub>14</sub> m5C <sub>14</sub> 40 µgi.v  | 0.01803 | 0.01891 | 0.02122 | 0.01690 | 0.01268 | <b>n=5</b> | <b>0.0159</b>          |
| Nanoparticles (NPs) i.v.                                  | 0.01910 | 0.02403 | 0.02376 | 0.02787 |         | <b>n=4</b> | <b>0.7302</b>          |
| Nanoparticles (NPs) i.t.                                  | 0.02833 | 0.02183 | 0.02258 | 0.02510 |         | <b>n=4</b> | <b>0.9048</b>          |
| cmRNA hCFTR m1U <sub>14</sub> m5C <sub>14</sub> 40 µgi.v. | 0.02027 | 0.02748 | 0.01823 | 0.02745 |         | <b>n=4</b> | <b>0.9048</b>          |
| pDNA hCFTR 40 µgi.v.                                      | 0.03159 | 0.02526 | 0.02450 | 0.02777 |         | <b>n=4</b> | <b>0.0635</b>          |
| pDNA hCFTR 80 µgi.t.                                      | 0.03650 | 0.03159 | 0.02468 | 0.03628 |         | <b>n=4</b> | <b>0.0317</b>          |

**Figure 4D: Lung Resistance. Source Data 21**

**Statistic:** Wilcoxon-Mann-Whitney test and  $P \leq 0.05$  (two-sided) was considered statistically significant

|                                                           |       |       |       |        |       |            | <b>P value (95%CI)</b> |
|-----------------------------------------------------------|-------|-------|-------|--------|-------|------------|------------------------|
| <i>Cftr</i> <sup>-/-</sup>                                | 1.659 | 1.343 | 1.467 | 1.271  | 1.160 | <b>n=5</b> | <b>N/A</b>             |
| <i>Cftr</i> <sup>-/-</sup>                                | 0.732 | 0.720 | 0.745 | 0.748  |       | <b>n=4</b> | <b>0.0159 /0.0159</b>  |
| cmRNA DsRed S2U <sub>14</sub> m5C <sub>14</sub> 40 µgi.v  | 1.520 | 0.957 | 1.292 | 1.226  | 1.257 | <b>n=5</b> | <b>0.4206</b>          |
| Nanoparticles (NPs) i.v.                                  | 1.172 | 1.059 | 1.153 | 1.296  |       | <b>n=4</b> | <b>0.111</b>           |
| Nanoparticles (NPs) i.t.                                  | 1.109 | 1.184 | 1.130 | 1.2925 |       | <b>n=4</b> | <b>0.111</b>           |
| cmRNA hCFTR m1U <sub>14</sub> m5C <sub>14</sub> 40 µgi.v. | 1.036 | 0.891 | 1.027 | 0.874  |       | <b>n=4</b> | <b>0.0159</b>          |
| pDNA hCFTR 40 µgi.v.                                      | 1.283 | 1.119 | 1.033 | 1.070  |       | <b>n=4</b> | <b>0.0635</b>          |
| pDNA hCFTR 80 µgi.t.                                      | 0.710 | 0.817 | 1.001 | 0.917  |       | <b>n=4</b> | <b>0.0159</b>          |

^

**Figure 4E: Tissue Elastance. Source Data 22**

**Statistic:** Wilcoxon-Mann-Whitney test and  $P \leq 0.05$  (two-sided) was considered statistically significant

|                                                                           |       |       |       |       |       |     | <b>P value (95%CI)</b>    |
|---------------------------------------------------------------------------|-------|-------|-------|-------|-------|-----|---------------------------|
| <i>Cftr</i> <sup>-/-</sup>                                                | 64.11 | 41.06 | 44.07 | 55.52 | 63.27 | n=5 | <b>N/A</b>                |
| <i>Cftr</i> <sup>-/-</sup>                                                | 28.36 | 33.41 | 33.67 | 30.69 |       | n=4 | <b>0.0159<br/>/0.0159</b> |
| cmRNA DsRed<br>S2U <sub>100</sub> m5C <sub>100</sub><br>40 μgi.v          | 48.93 | 50.57 | 35.04 | 46.23 | 40.48 | n=5 | <b>0.222</b>              |
| Nanoparticles (NPs)<br>i.v.                                               | 53.60 | 61.30 | 44.70 | 54.32 |       | n=4 | <b>0.7302</b>             |
| Nanoparticles (NPs) i.t.                                                  | 57.60 | 62.08 | 49.85 | 51.70 |       | n=4 | <b>0.999</b>              |
| cmRNA h <i>CFTR</i><br>m1U <sub>100</sub> m5C <sub>100</sub><br>40 μgi.v. | 37.31 | 31.49 | 40.52 | 30.76 |       | n=4 | <b>0.0159</b>             |
| pDNA h <i>CFTR</i><br>40 μgi.v.                                           | 37.52 | 41.61 | 34.88 | 22.43 |       | n=4 | <b>0.0159</b>             |
| pDNA h <i>CFTR</i><br>80 μgi.t.                                           | 31.39 | 36.65 | 35.08 | 38.98 |       | n=4 | <b>0.0159</b>             |

**Figure 4E. FEV<sub>1</sub> Source Data 23.**

**Statistic:** Wilcoxon-Mann-Whitney test and  $P \leq 0.05$  was considered statistically significant

|                                                                           |      |      |      |      |      |     | <b>P value (95%CI)</b>    |
|---------------------------------------------------------------------------|------|------|------|------|------|-----|---------------------------|
| <i>Cftr</i> <sup>-/-</sup>                                                | 0.60 | 0.68 | 0.71 | 0.64 |      | n=4 | <b>N/A</b>                |
| <i>Cftr</i> <sup>-/-</sup>                                                | 0.91 | 0.98 | 1.19 | 1.07 | 0.98 | n=5 | <b>0.0079<br/>/0.0079</b> |
| cmRNA DsRed<br>S2U <sub>100</sub> m5C <sub>100</sub><br>40 μgi.v          | 0.52 | 0.53 | 0.67 | 0.52 |      | n=4 | <b>0.0571</b>             |
| Nanoparticles (NPs)<br>i.v.                                               | 0.69 | 0.70 | 0.64 | 0.65 |      | n=4 | <b>0.3858</b>             |
| Nanoparticles (NPs) i.t.                                                  | 0.61 | 0.54 | 0.70 | 0.72 |      | n=4 | <b>0.500</b>              |
| cmRNA h <i>CFTR</i><br>m1U <sub>100</sub> m5C <sub>100</sub><br>40 μgi.v. | 0.71 | 0.81 | 0.79 | 0.80 |      | n=4 | <b>0.0286</b>             |
| pDNA h <i>CFTR</i><br>40 μgi.v.                                           | 0.71 | 0.74 | 0.81 | 0.68 |      | n=4 | <b>0.0571</b>             |
| pDNA h <i>CFTR</i><br>80 μgi.t.                                           | 0.84 | 0.73 | 0.79 | 0.62 |      | n=4 | <b>0.100</b>              |

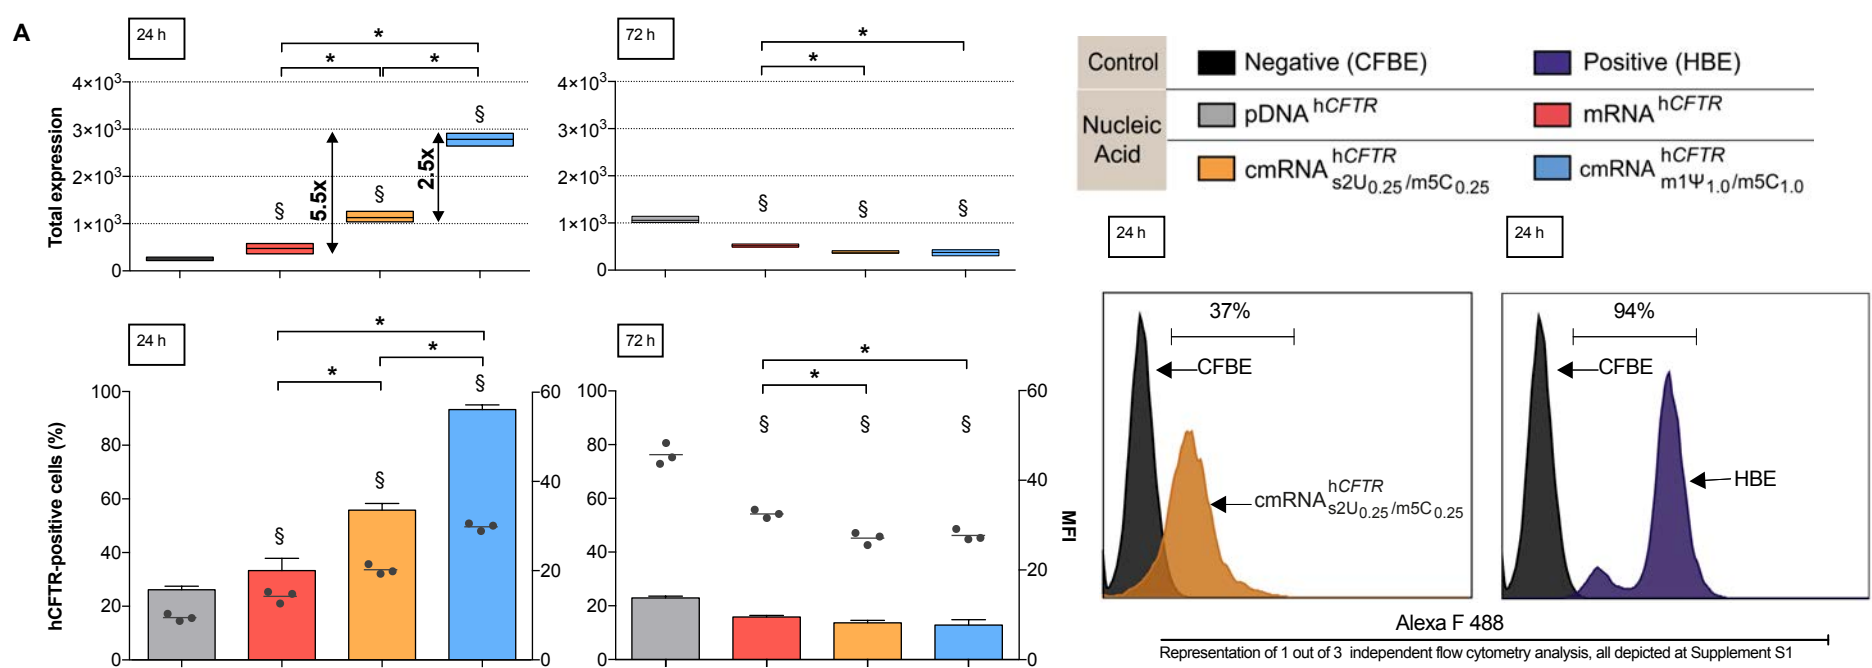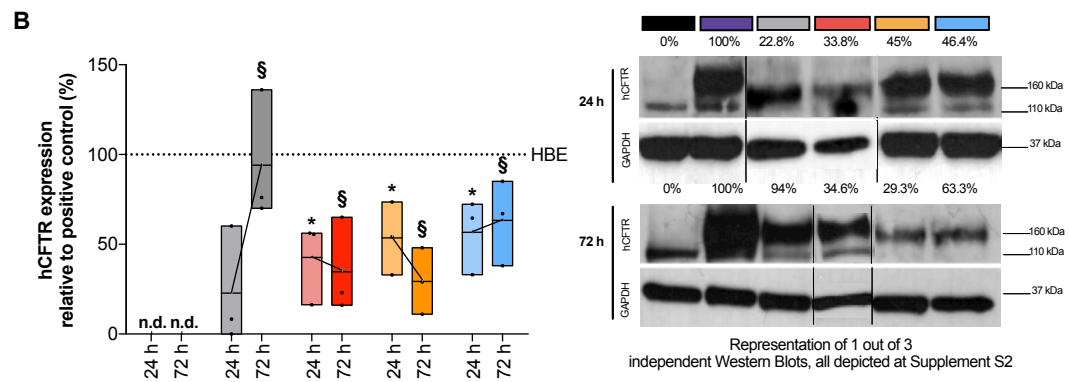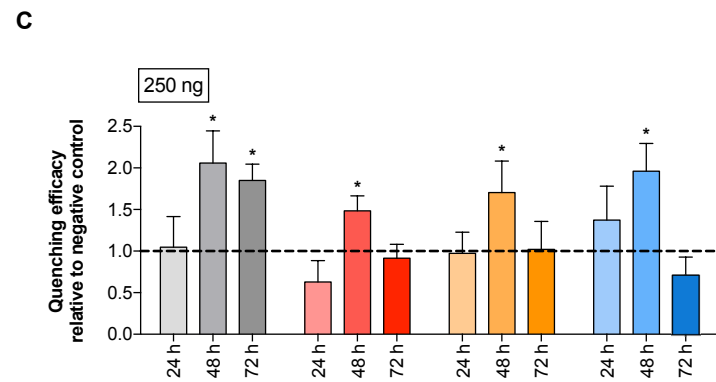

**A**

|              | CS-PLGA NPs                                                                           | $\mu\text{g}$ ( <i>in vivo</i> ) | $\mu\text{g}$ (WBA)             |
|--------------|---------------------------------------------------------------------------------------|----------------------------------|---------------------------------|
| Controls     | <i>Cftr</i> <sup>-/-</sup> / Blood only                                               | —                                | n.a.                            |
|              | <i>E. coli</i> (Total RNA)                                                            | +                                | 40 i.v.                         |
|              | R-848                                                                                 | —                                | 20                              |
| Mock         | cmRNA <sub>s2U<sub>0.25</sub>/m5C<sub>0.25</sub></sub>                                | —                                | n.a.                            |
|              | Nanoparticles (i.v.)  Nanoparticles (i.t.)                                            | +                                | —                               |
| Nucleic Acid | pDNA <sup>hCFTR</sup>                                                                 | +                                | 40 i.v. <sup>⊖</sup><br>80 i.t. |
|              | mRNA <sup>hCFTR</sup>                                                                 | +                                | —                               |
|              | cmRNA <sup>hCFTR</sup> <sub>s2U<sub>0.25</sub>/m5C<sub>0.25</sub></sub>               | +                                | 40 i.v.                         |
|              | cmRNA <sup>hCFTR</sup> <sub>m1<math>\Psi</math><sub>1.0</sub>/m5C<sub>1.0</sub></sub> | +                                | 40 i.v.                         |
|              | cmRNA <sup>hCFTR</sup> <sub>s2U<sub>0.25</sub>/m5C<sub>0.25</sub></sub>               | +                                | 40 i.t.                         |
|              | cmRNA <sup>hCFTR</sup> <sub>s2U<sub>0.25</sub>/m5C<sub>0.25</sub></sub>               | +                                | 80 i.t.                         |

<sup>⊖</sup> pDNA has been equalised to mRNA by nmols instead of  $\mu\text{g}$

**B**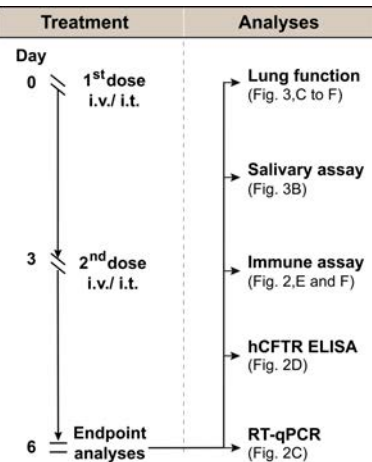**C**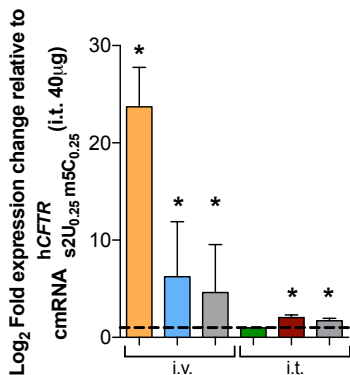**D**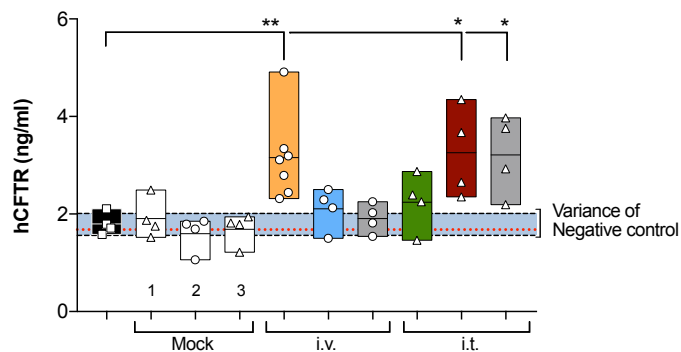**E**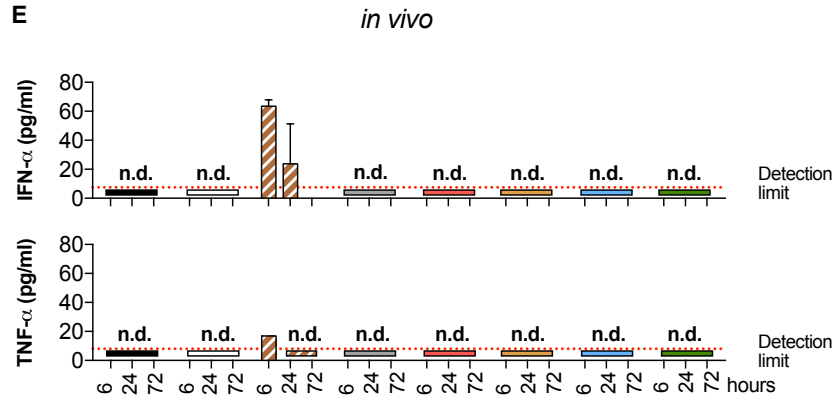**F**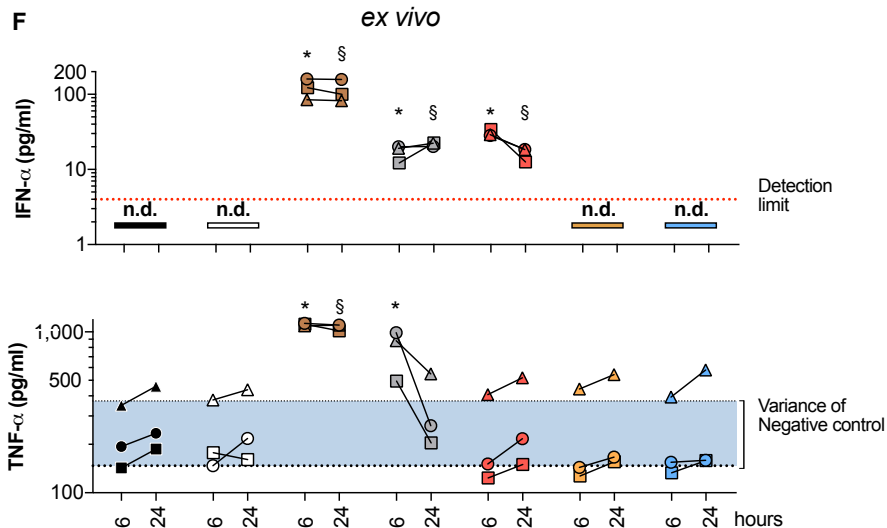

**A**

|              |                                                                                  | CS-PLGA NPs | µg      |
|--------------|----------------------------------------------------------------------------------|-------------|---------|
| Controls     | ■ <i>Cftr</i> <sup>-/-</sup>                                                     | —           | n.a.    |
|              | ■ <i>Cftr</i> <sup>+/+</sup>                                                     | —           | n.a.    |
| Mock         | 1 cmRNA <sup><i>DsRed</i></sup> <sub>S2U<sub>0.25</sub>/m5C<sub>0.25</sub></sub> | +           | 40 i.t. |
|              | 2 Nanoparticles (NPs) i.v.                                                       | +           | n.a.    |
|              | 3 Nanoparticles (NPs) i.t.                                                       | +           | n.a.    |
| Nucleic Acid | ■ cmRNA <sup><i>hCFTR</i></sup> <sub>S2U<sub>0.25</sub>/m5C<sub>0.25</sub></sub> | +           | 40 i.v. |
|              | ■ cmRNA <sup><i>hCFTR</i></sup> <sub>S2U<sub>0.25</sub>/m5C<sub>0.25</sub></sub> | +           | 40 i.t. |
|              | ■ cmRNA <sup><i>hCFTR</i></sup> <sub>S2U<sub>0.25</sub>/m5C<sub>0.25</sub></sub> | +           | 80 i.t. |

**B**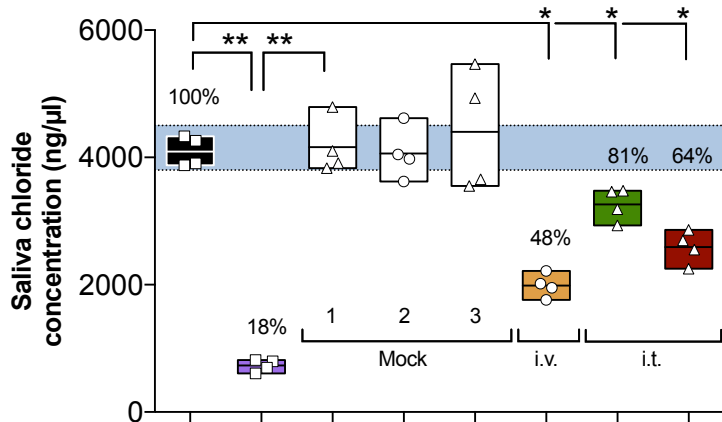**C**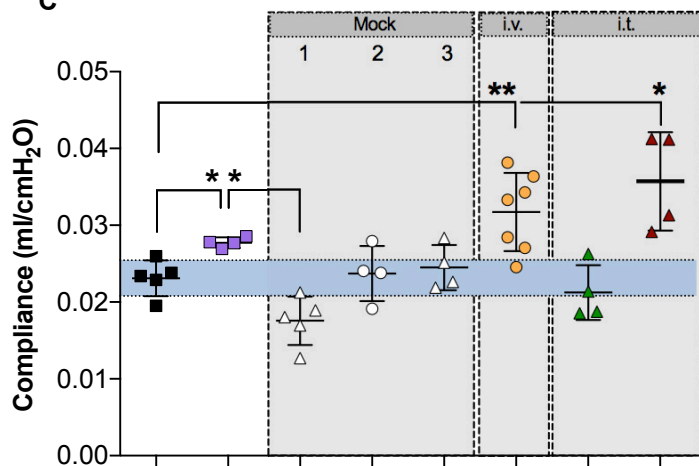**D**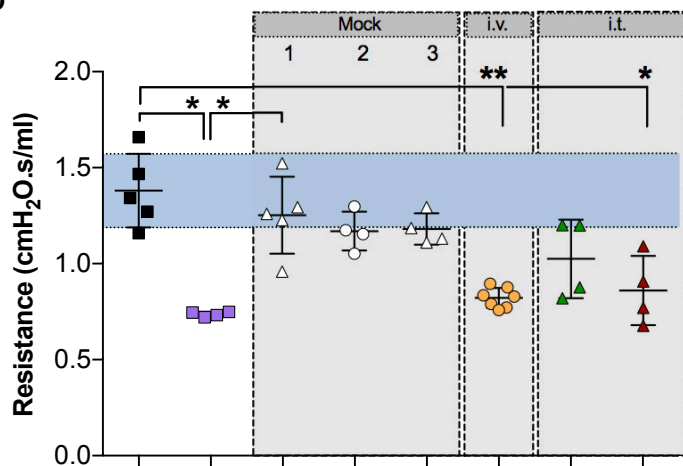**E**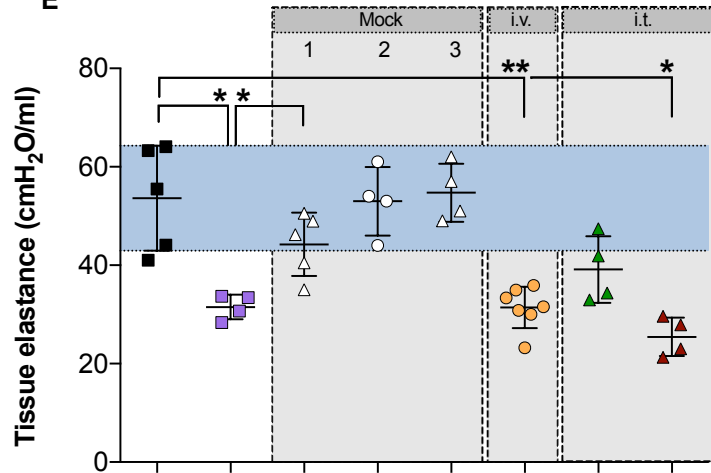**F**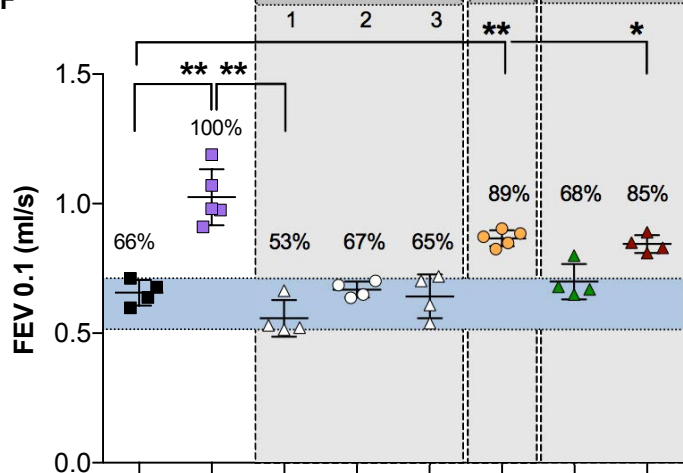

**A**

|              |                                                                                  | CS-PLGA NPs |   | µg                   |
|--------------|----------------------------------------------------------------------------------|-------------|---|----------------------|
| Controls     | ■ <i>Cftr</i> <sup>-/-</sup>                                                     | —           | — | n.a.                 |
|              | ■ <i>Cftr</i> <sup>+/+</sup>                                                     | —           | — | n.a.                 |
| Mock         | 1 cmRNA <sup><i>DsRed</i></sup> <sub>s2U<sub>0.25</sub>/m5C<sub>0.25</sub></sub> | +           | + | 40 i.t.              |
|              | 2 Nanoparticles (NPs) i.v.                                                       | +           | + | n.a.                 |
|              | 3 Nanoparticles (NPs) i.t.                                                       | +           | + | n.a.                 |
| Nucleic Acid | ■ cmRNA <sup><i>hCFTR</i></sup> <sub>m1Ψ<sub>1.0</sub>/m5C<sub>1.0</sub></sub>   | +           | + | 40 i.v.              |
|              | ■ pDNA <i>hCFTR</i>                                                              | +           | + | 40 i.v. ∅<br>80 i.t. |

∅ pDNA has been equalised to mRNA by nmols instead of µg

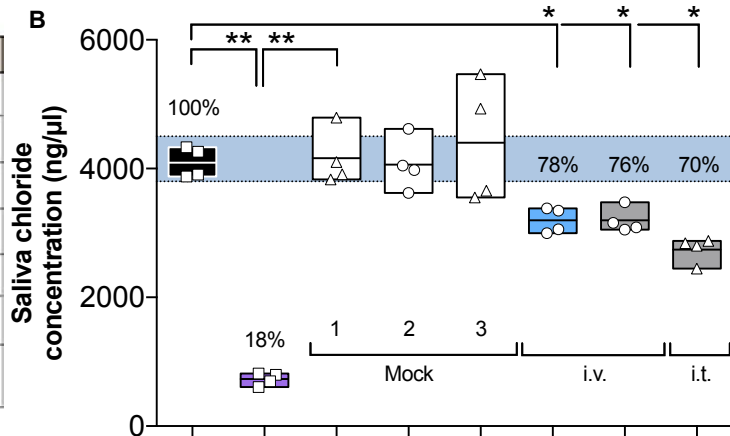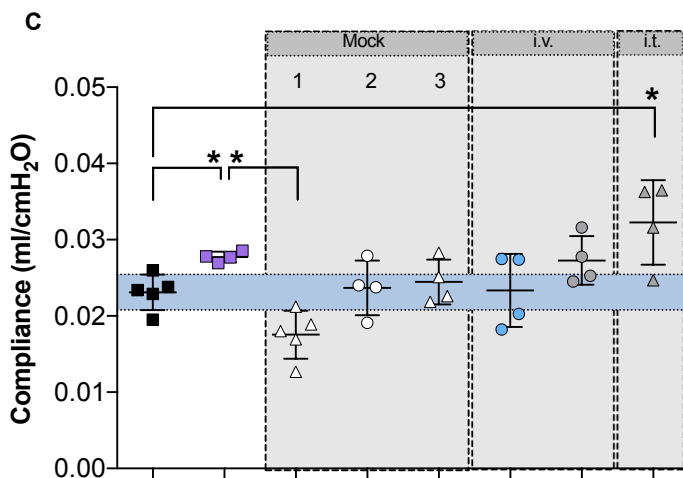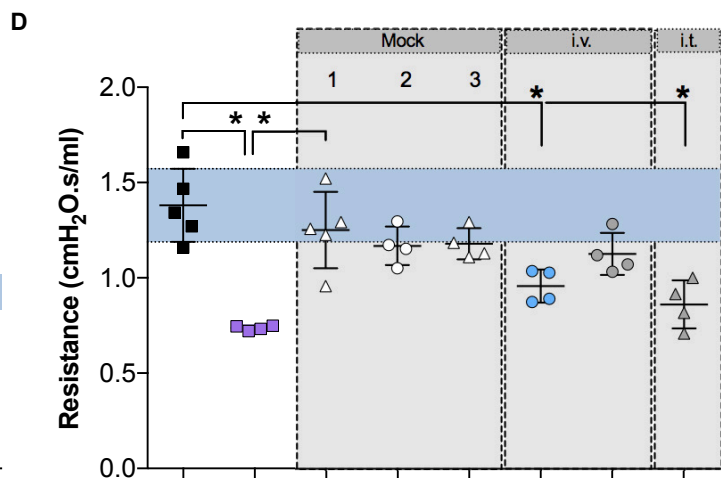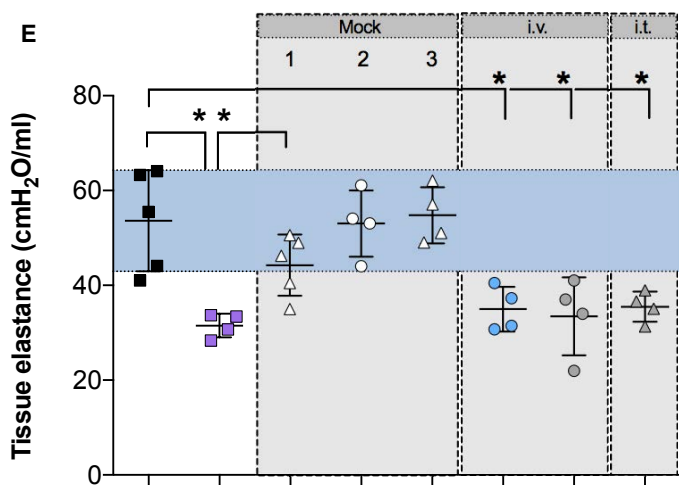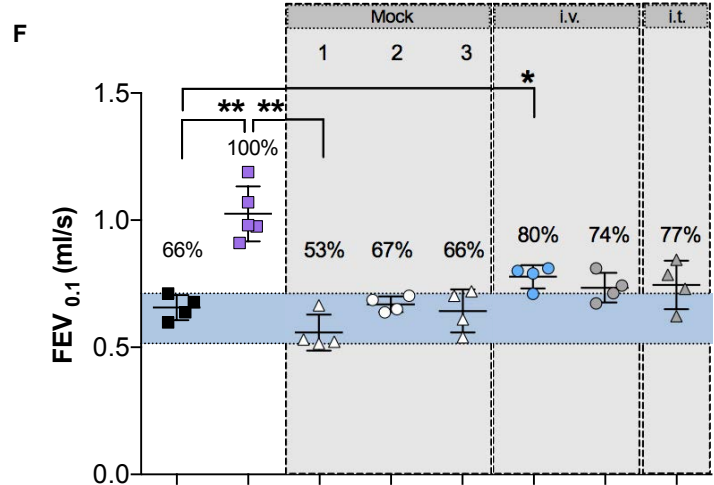

Source: https://www.biorxiv.org/content/10.1101/202853v1.full.pdf
